# Supplementary material
Source: PubMed Central journal article supplement (PMC5642710)
Supplement: pnas.1708349114.sapp.pdf [file pnas.1708349114.sapp.pdf]

# Supporting Information Appendix

Engineering of tomato for the sustainable production of ketocarotenoids and its evaluation in aquaculture feed

Marilise Nogueira, Eugenia M. A. Enfissi, Maria E. Martínez Valenzuela, Guillaume N. Menard, Richard L. Driller, Peter J. Eastmond, Wolfgang Schuch, Gerhard Sandmann, Paul

D. Fraser

- SI text
- SI figures (1-9)
- SI tables (1-7)

## **SI text: Materials and Methods**

### **Extraction and analysis of metabolites.**

**Carotenoids.** Carotenoids were extracted from freeze dried tomatoes, freeze dried trout parts (fillets, livers and eyes), feces and feeds. Extractions were made in three technical replicates from sample powder (15 mg for the tomatoes and 100 mg for the trout parts, feces and feeds) in 2 mL centrifuge tubes. Metabolites were extracted by the addition of chloroform and methanol (2:1). Samples were stored for 20 min on ice. Subsequently, water (1 vol.) was added. Samples were centrifuged for 5 min at top speed in a Heraeus Pico21 centrifuge (Thermo Scientific). The organic phase, containing the pigment extract, was placed in a fresh centrifuge tube and the aqueous phase was re-extracted with chloroform (x2 by volume). Organic phases were pooled and dried using the Genevac EZ.27 (SP scientific). Dried samples were stored at -20°C and resuspended in ethyl acetate prior to spectrophotometric and chromatographic analysis.

Carotenoids were separated and identified by Ultra High Performance Liquid Chromatography with photo diode array detection (UPLC-PDA). An Acquity™ Ultra High Performance Liquid Chromatography UPLC System (Waters) was used with an Ethylene Bridged Hybrid (BEH C18) column (2.1 x 100 mm, 1.7 µm) with a BEH C18 VanGuard pre-column (2.1 x 50 mm, 1.7 µm). The mobile phase used was A: MeOH/H<sub>2</sub>O (50/50) and B: ACN (acetonitrile)/ethyl acetate (75:25). All solvents used were High Performance Liquid Chromatography HPLC grade. The gradient was 50% A:50% B for 0.5 min and then stepped to 30% A:70% B for 4.5 min, to 0% A: 100% B for 2 min, back to 30% A: 70% B for 1 min and to 50% A:50% B for the two last minutes. Column temperature was maintained at 30°C and the temperature of samples at 8°C. On-line scanning across the ultraviolet/visible range was performed in a

continuous manner from 250 to 600 nm, using an extended wavelength photo diode array detector (Waters). Carotenoids were quantified from dose-response curves made using authentic standards.

**Fatty acids.** Fatty acids were extracted from 20 mg of freeze dried tomato powder or 50 mg of freeze dried trout fillet powder and feed. Transmethylation was performed as follow: Methanolic-HCl 1N (1 mL) was added to the material as well as the internal standard (Heptadecanoic acid, 100 µg) and incubated at 85°C for 3 h. Hexane (500 µL) and 0.8% potassium chloride (500 µL) were added to the mixture and vortexed twice for 10 sec. The mix was centrifuged for 5 min at 2,000 rpm. The upper phase was transferred into a fresh GC vial.

Gas chromatography with flame-ionisation detector (GC-FID) analysis was performed on an Agilent 7890A with a DB-23 column. The gas chromatography oven was held for 2 min at 150°C before ramping at 10°C/min to 240°C. This final temperature was held for a further 9 min. Component identification was performed by comparison with fatty acid standards. Fatty acid quantification was achieved relative to the internal standard.

**Retinoids.** A retinoid extraction method was adapted from Gesto, Castro, Reis-Henriques and Santos (37). Freeze dried powdered trout livers (1 g) were vortexed for 2 min in 10 mL of methanol containing the internal standard (9-anthracenocarboxylic acid, 1 µg) and then centrifuged at 4,000 g for 15 min at 4°C. Approximately 8 mL of supernatant was collected in 15 mL Falcon tubes and 2 mL of molecular water was added before purification by solid-phase extraction (SPE). The SPE MAX cartridges (Oasis<sup>TM</sup>, 6cc Vac, 30 µm, Waters) were conditioned with first 4 mL of methanol and centrifuged at 4,000 g for 1 min followed by 4 mL of molecular water, centrifuged at 4,000 g for 1 min. The supernatants were applied to the conditioned columns by

centrifugation at 1,000 g for 1 min. The MAX cartridges were then washed with 4 mL of 5% NH<sub>4</sub>OH (v/v) in water by centrifuging at 2,800 g for 1 min. The retinoids were eluted with 5 mL of methanol (1 min at 2,800 g) twice. 2% formic acid in methanol (50 µL) were added immediately to this eluate to prevent saponification. The eluate was dried by means of Genevac EZ.27 and nitrogen and stored, if necessary, at -80°C until resuspended in methanol prior to further analysis.

Retinoids were separated and identified by High Performance Liquid Chromatography with photodiode array detector (HPLC-PDA). A Waters Alliance HPLC system (UK) was used (Waters 600S controller, Waters 610 pump, Waters 996 photodiode array detector and Waters 717 plus auto-sampler) with a HiCHROM 5 µm C18 column (300 x 4.6 mm) coupled to a HiCHROM 5 C18 guard column. The mobile phases used were A: MeOH/H<sub>2</sub>O (50/50) containing 0.01% of formic acid (by vol.) and B: MeOH with 0.01% of formic acid (by vol.). The gradient was 100% A: 0% B for 2.5 min, then stepped to 50% A: 50% B in 0.5 min then to 10% A: 90% B in 2 min and to 0% A: 100% B in 5 min. The gradient was maintained in these conditions for 15 min, and then stepped to 100% A: 0% B in 5 min. The column temperature was maintained at 30°C with a Jones Chromatography column heater/cooler. Detection was performed continuously from 220 to 600 nm with an online photodiode array detector. Retinoids were analysed at wavelengths of 325 and 350 nm. Component identification was performed by co-chromatography and comparison of spectral properties and retention times with authentic standards, when available, and reference spectra.

To complement the UV/Vis and chromatographic properties used to identify the retinoids, Mass Spectrometry (MS) was also employed. Separations were performed by HPLC (Ultimate 3000, Dionex) prior to on-line MS in a similar manner to that detailed above, with the exception that an YMC-UltraHT pro C18 (100×2.0 mm, S-2 µm)

coupled to its guard column (20 x 4.6 mm) was used. The mobile phase was altered to facilitate ionisation and was comprised of (A) MeOH/H<sub>2</sub>O (50/50) containing 0.01% of formic acid (by vol.) and (B) methanol containing 0.01% formic acid (by vol.). These solvents were used in the same gradient mode as described above except that the initial conditions (100% A) were restored for 5 min after the gradient to re-equilibrate the system. The flow rate used was 0.2 ml/min. The HPLC system was coupled to maXis<sup>TM</sup> quadrupole-time-of-flight (QTOF, Bruker, Germany) equipped with an electrospray ionisation source (ESI). Parameters for analysis were set using positive ion mode, with spectra acquired over a mass range from 50 to 900 m/z. The optimum values of the ESI-MS parameters were: capillary voltage: 4500V; drying gas temperature: 190°C; drying gas flow: 8L/min; nebulising gas pressure: 1 bar. Instrument calibration was performed externally prior to each sequence with sodium formate solution (10 mM). Automated post-run internal calibration was performed by injecting the same sodium formate calibrant solution at the end of each sample run via a six port diverter valve equipped with a 20 µL loop.

**Cholesterol.** Cholesterol extraction from the trout filets and livers was performed as described above for the carotenoids. An aliquot (~ 1/7<sup>th</sup>) was removed from the organic phase extract, the internal standard (myristic acid D27, 10 µg) was added and then the aliquot was dried using the Genevac EZ.27. Three extractions were performed on each biological replicate. Derivatization was performed by the addition of methoxyamine hydrochloride (30 µL, Sigma–Aldrich) at 20 mg/mL, in pyridine. Samples were incubated at 40°C for 1 h, after which MSTFA (*N* methyl-*N*-trimethylsilyltrifluoroacetamide; Sigma-Aldrich; 70 µL) was added and the samples incubated for 2 h at 40°C before analysis. Gas chromatography-mass spectrometry analysis was performed on an Agilent HP6890 (UK) gas chromatograph with a

5973MSD. Samples (1  $\mu$ L) were injected with a split/splitless injector at 290°C with a 20:1 split. Retention time locking to the internal standard was used. The gas chromatography oven was held for 4 min at 70°C before ramping at 5°C/min to 310°C. This final temperature was held for a further 10 min, making a total time of 60 min. The interface with the MS was set at 290°C and MS performed in full scan mode using 70 eV EI+ and scanned from 10 to 800 D. Component identification was performed by comparison with the mass spectral characteristic and retention index of the cholesterol standard. Quantification was achieved using Chemstation (Agilent) software facilitating integrated peak areas for specific compound targets (qualifier ions) and using a dose-response curve for the cholesterol standard.

**Phoenicoxanthin esters fatty acid determination.** The ketocarotenoid esters found in the tomato UPLC chromatogram profile were individually isolated for further characterization. First, the ketocarotenoid esters were saponified using the cholesterol esterase from *Pseudomonas* (Sigma, UK). Protocol was adapted from Jacobs, Leboeuf, Mccommas and Tauber (39) and Stalberg, Lindgren, Ek and Hoglund (40). In brief, the organic phase pellet, obtained as described in the carotenoid extraction section, was resuspended in acetone then cholesterol esterase stock solution (20 units/mL in 0.05M Tris-HCl, pH 7.0) was added (2.7:1, by vol.). The mix was incubated at 37°C for 45 min. Diethylether (20% in petroleum ether) was then added (2:1, by vol.), vortexed and centrifuged for 3 min at 3,500 rpm. The upper phase was transferred in a fresh Eppendorf tube and the lower phase was extracted a second time and the extract pooled with the first extract. Na<sub>2</sub>SO<sub>4</sub> anhydrous (~0.2g) was then added and the mixture was extracted twice again with 20% diethylether. The saponified ketocarotenoid esters were then analysed by HPLC following the procedure described above (Carotenoid chromatographic analysis). The saponified ketocarotenoids were identified as

phoenicoxanthin by comparison of spectral characteristic and retention time value of the authentic standard.

To determine the fatty acids attached to the phoenicoxanthin esters, the compounds were analysed using mass spectrometry. Separations were performed by HPLC (Ultimate 3000, Dionex) prior to on-line MS using a RP C30 3  $\mu\text{m}$  column (150 $\times$ 2.1 mm i.d., YMC) coupled to a 20 $\times$ 4.6 mm C30 guard column. The column temperature was maintained at 30°C. The mobile phase was comprised of (A) methanol containing 0.1% formic acid (by vol.) and (B) tert-butyl methyl ether containing 0.1% formic acid (by vol.). These solvents were used in a gradient mode starting at 100% (A) for 5 min, then stepped to 95% (A) for 4 min, followed by a linear gradient over 30 min to 25% (A). After this gradient (A) was a step down to 10% over 10 min. Initial conditions (100% A) were restored for 10 min after the gradient to re-equilibrate the system. The flow rate used was 0.2 ml/min. The HPLC system was coupled to maXis<sup>TM</sup> quadrupole-time-of-flight (QTOF, Bruker, Germany). The ionisation mode employed was Atmospheric Pressure Chemical Ionisation (APCI) operating in positive mode. Capillary and APCI vaporisation temperatures were set at 250°C and 450°C respectively and the gas flow (nitrogen) at 4L/min. APCI source settings were as follows: nebuliser pressure 2.5 bar, corona current 4  $\mu\text{A}$  and a capillary voltage of 4.5 kV. A full MS scan was performed from 300 to 1500 m/z and MS/MS spectra were recorded at the isolation width of 0.2 m/z. Identification of the fatty acids attached to the phoenicoxanthin was done by comparison with the expected mass in the MS and MS/MS profiles of the phoenicoxanthin esters. Instrument calibration was performed externally prior to each sequence with APPI/APCI calibrant solution (Agilent Technologies). Automated post-run internal calibration was performed by injecting the

same APPI/APCI calibrant solution at the end of each sample run via a six port divert valve equipped with a 20  $\mu$ L loop.

**Phoenicoxanthin optical isomerism analysis.** Fractions of phoenicoxanthin were collected and optical isomerism studied using a liquid chromatography method adapted from Wang, Armstrong and Chang (41). HPLC separations were performed using a Chiralpak IC (5  $\mu$ m, 250 x 4.6 mm) column coupled with its guard column (Chromex scientific) and a Water Alliance HPLC system (Water 600S controller, Water 610 pump, Waters 996 photodiode array detector and Waters 717plus auto-sampler). The mobile phase used was methyl butyl ether /acetonitrile (50:50, v/v) isocratically for 20 min with a flow rate of 1 mL/min. The column was maintained at 26°C with a Jones Chromatography column heater/cooler. Detection was performed continuously from 220 to 700 nm with an online photodiode array detector. Ketocarotenoids were analysed at a wavelength of 470 nm. Component identification was performed by comparison of spectral properties and retention times with authentic standards and reference spectra.

#### **Trout trials.**

**Feed preparation.** Tomato powders were obtained by freeze drying and then homogenizing the tomatoes. The powders were made at the last minute and stored at -80°C to prevent carotenoid degradation before being shipped to the trout trial locations (Germany and Chile) for integration into the fish feeds. The ZWRI tomato extract was obtained by extracting several kilograms of frozen tomato. The method used was as follow, for 1.5 kg of frozen tomatoes, 1.5 L of acetone was added and left for two hours. Then the mixture was homogenized using a blender and 1 L of 10% diethylether in petroleum ether was added. The mixture was then filtered through two layers of Whatman filter paper using an electric pump. Subsequently, 200 mL of water saturated with salt were added to the filtrate. A glass separatory vessel was used and two phases



were observed and the upper phase (red color) was collected. Anhydrous Na<sub>2</sub>SO<sub>4</sub> was then added to the extract and left at -20°C for two hours. The supernatant was then collected and dried using nitrogen. Carotenoids were quantified in both the powders and extract by means of the liquid chromatographic method described above.

The composition of the feeds are described in Table S2 & S3. Figure S3a gives an overview of the composition of the different feeds.

**Statistical power of the study.** A Post-hoc power analysis was performed to assess the statistical power of the study. A power of 100% was obtained when comparing the trout from the fresh water experiment (N=15), 95.6% when comparing the trout from the fresh water experiment to the 60 days trout of the brackish experiment (N=10) and 89.7% when comparing the trout from the fresh water experiment to the 80 days trout of the brackish experiment (N=5). The study of the presence/absence of ketocarotenoids in the flesh of the trout only required N=3 to have a power of 100%.

**Statistical analysis.** For the study of plant material, three to five biological replicates with three technical replicates per biological replicates were analysed for every experiment. For the study of the trout material, five to fifteen biological replicates with three technical replicates per biological replicate were investigated for each experiment unless stated otherwise. IBM SPSS Statistics 21 software was utilized to determine significant differences between groups. First, the choice of the most appropriate statistical test was made based on several assumptions. For instance, for the one-way ANOVA statistical test, the following assumptions had to be met: 1, there is one dependent variable that is measured at the continuous level; 2, there is one independent variable that consists of two or more categorical, independent groups; 3, there is independence of observations.

The outliers were then studied using boxplot analysis. Any data points that were more than 1.5 box-lengths from the edge of their box were classified as outliers. Only extreme outliers (3 box-lengths from the edge of their box) were removed from the dataset. In all the analyses performed, they never represented more than 10% of the data points. The normality was then tested with a Shapiro-Wilk test and subsequently the homogeneity of variance with a Levene test. Depending on the results of the assumptions, the statistical test varied slightly. For instance, if homogeneity of variance was assumed in the one-way ANOVA test, a Tukey post Hoc test was performed. However, if this assumption was violated, a Games-Howell post Hoc test was used. P-values were calculated and represented in figures as follow:  $P < 0.05$ ,  $P < 0.01$ , and  $P < 0.001$  were indicated by \*, \*\*, and \*\*\*, respectively, when appropriate. Table S7 describes all the statistical tests performed in this paper and all the p-values obtained with the SPSS software.

**Randomization.** Randomization technique was used whenever possible. For the trout trials, the different feed conditions (basic feed, control tomato feed, ZWRI tomato feed, ZWRI extract feed and commercial feed) were assigned to the tanks randomly. For samples analysis, the samples were extracted and analyzed in the different instruments in a random order. The Microsoft Excel software was used to create randomized sequences.

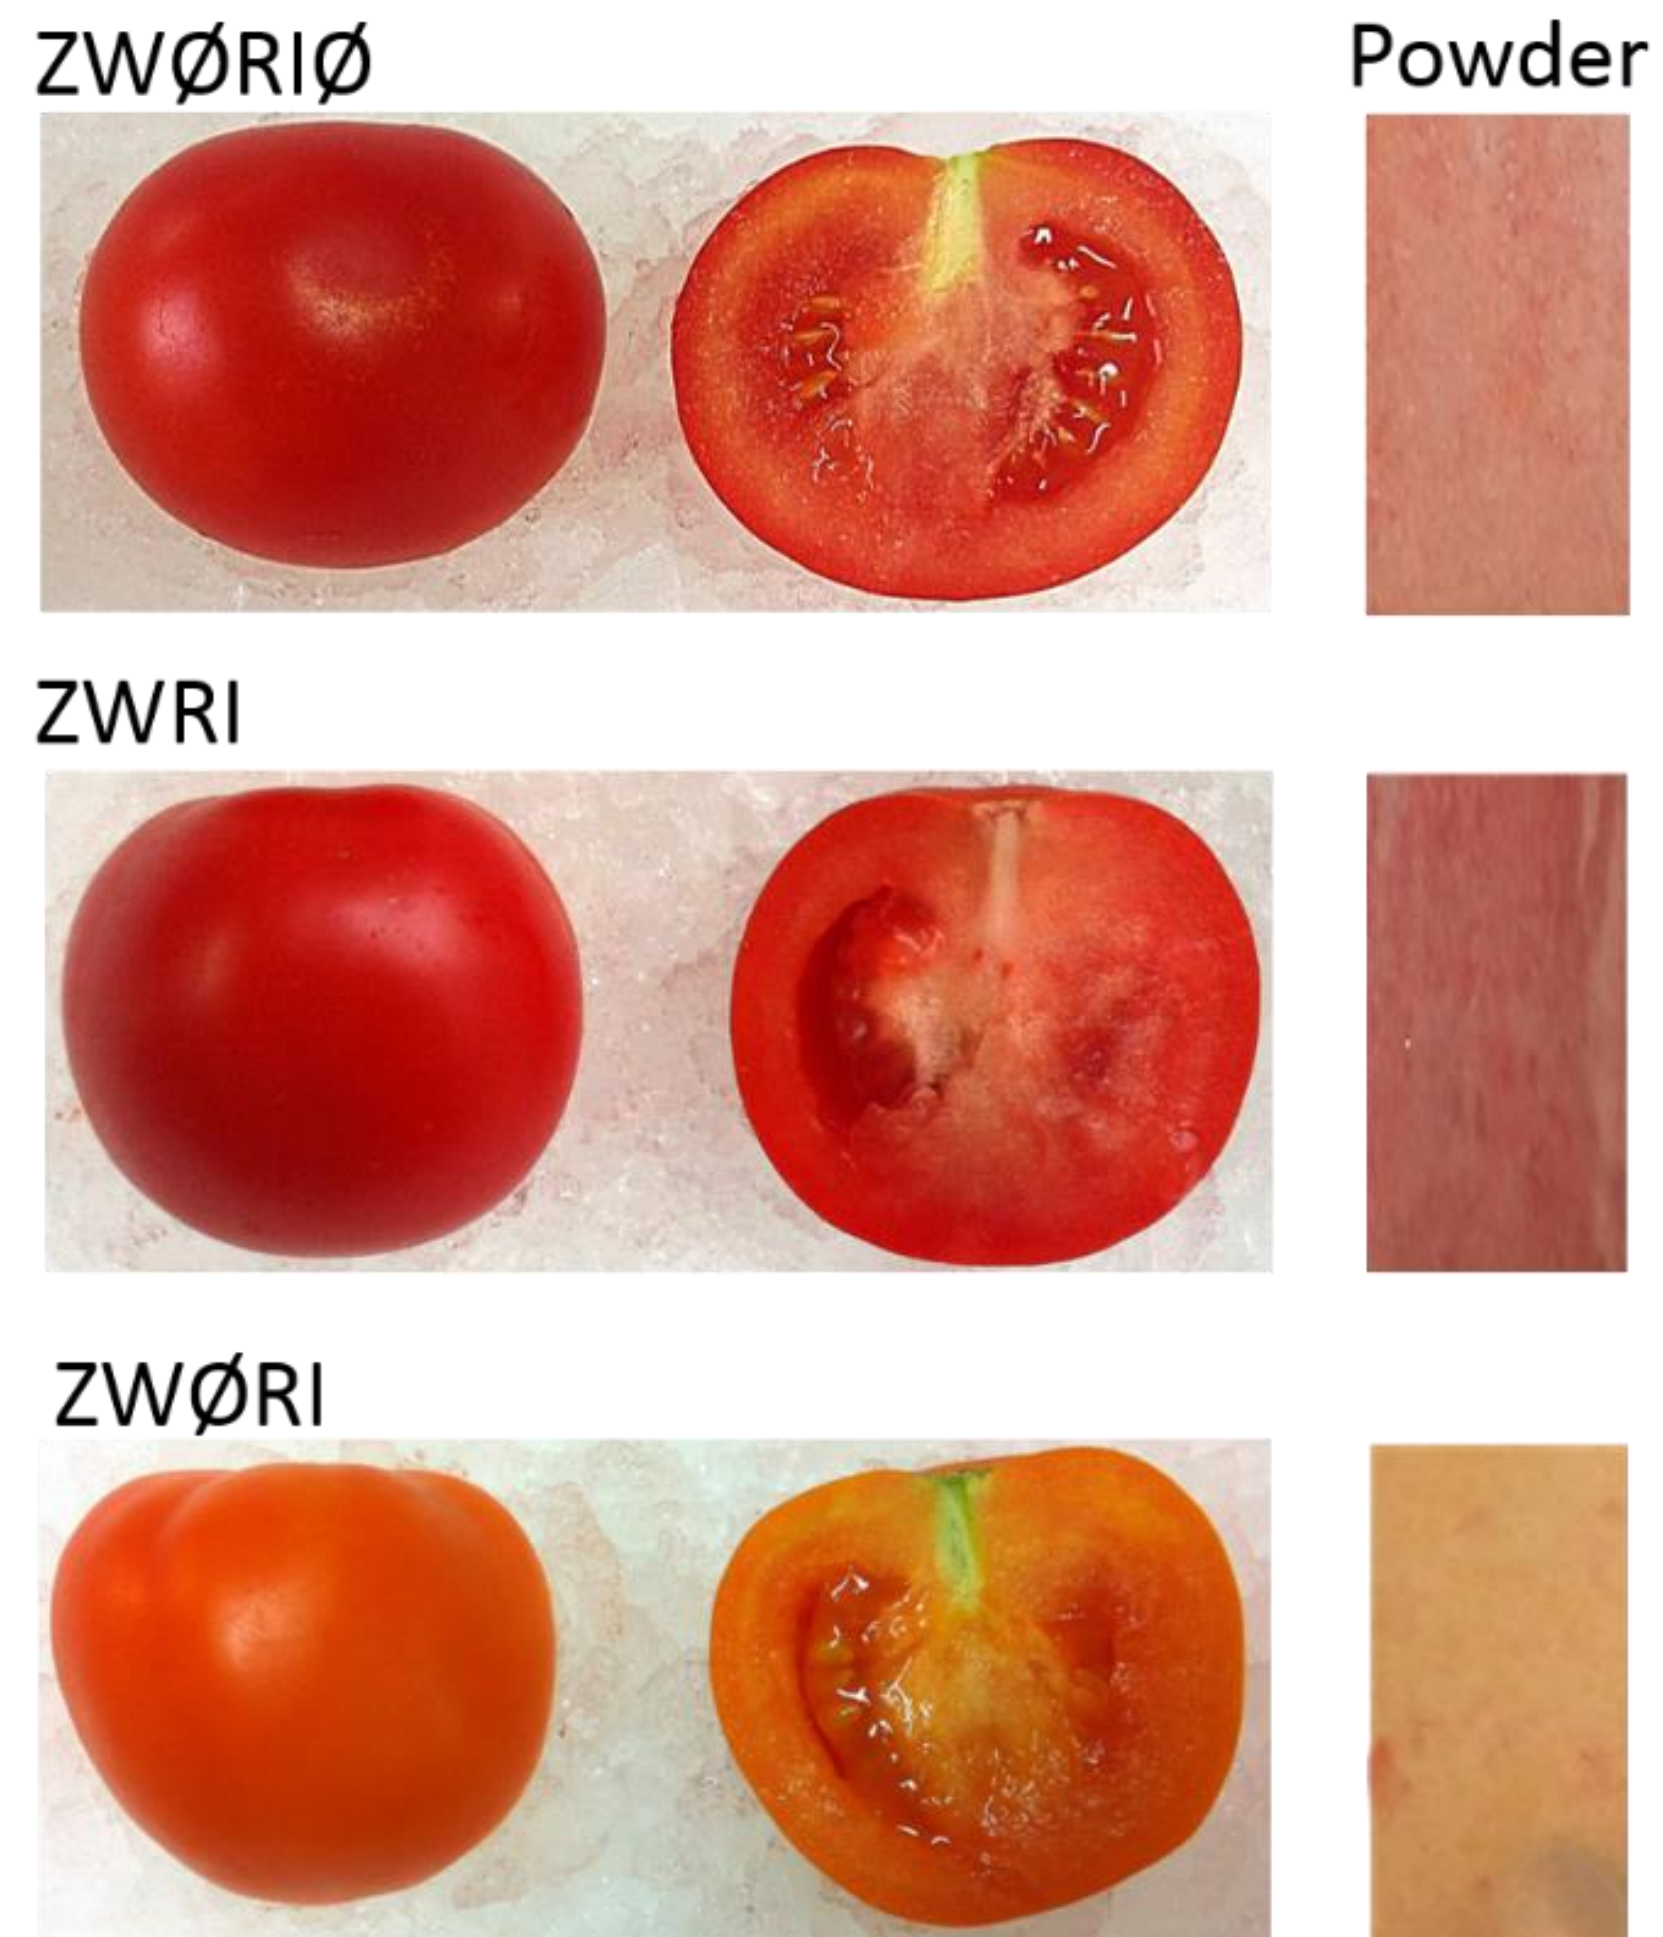

**Fig. S1** ZWRI tomato and azygous controls phenotypes. Photographs of ZWØRIØ, ZWRI and ZWØRI halves are shown to depict their different colors as the photographs of the powders obtained by freeze-drying these tomatoes.

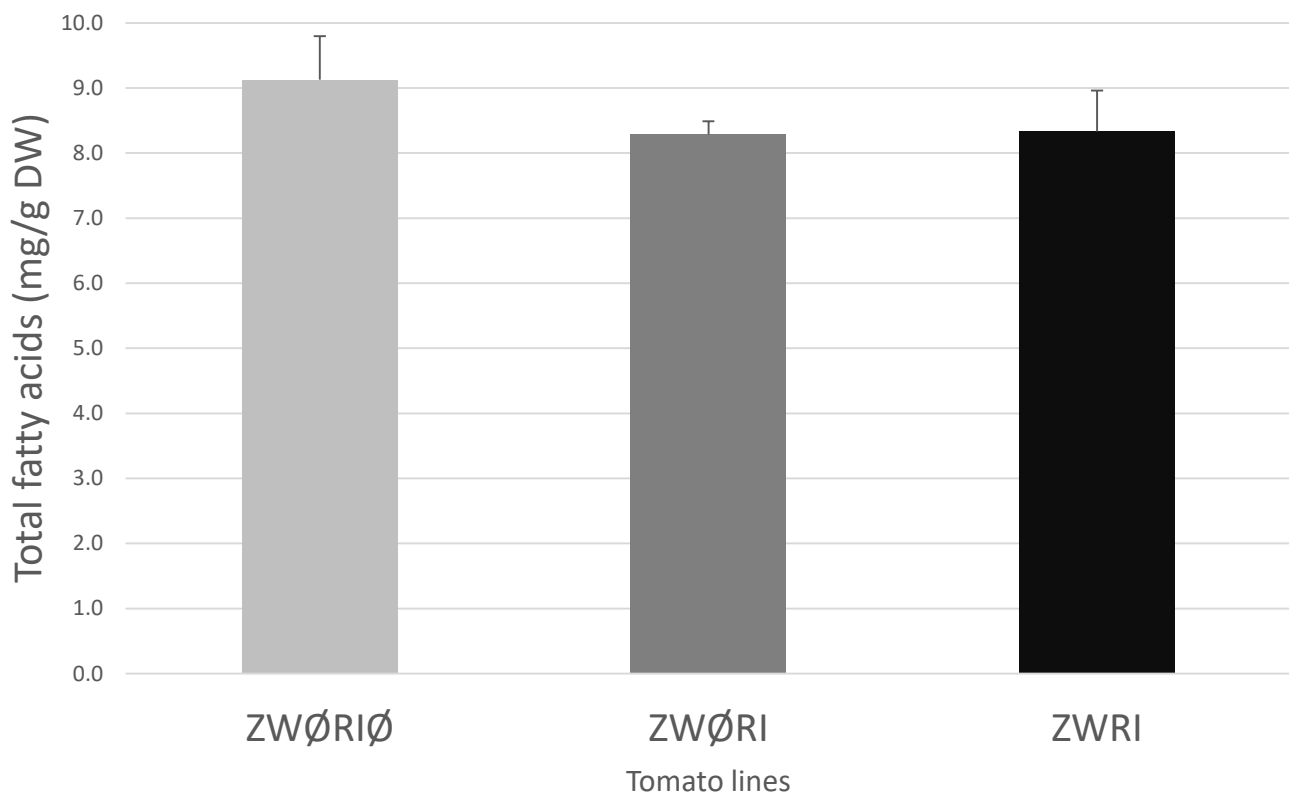

**Fig. S2** Total fatty acid quantification in ZWRI tomato and azygous controls. Fatty acids contents are presented as mg/g DW. Three representative fruits from three plants were analysed. The fruits were pooled and three determinations were made per sample. The mean data are presented  $\pm$  SD. Computed p-values for each comparison are tabulated in Table S7.

## a Trout feeds

### Fresh water experiment

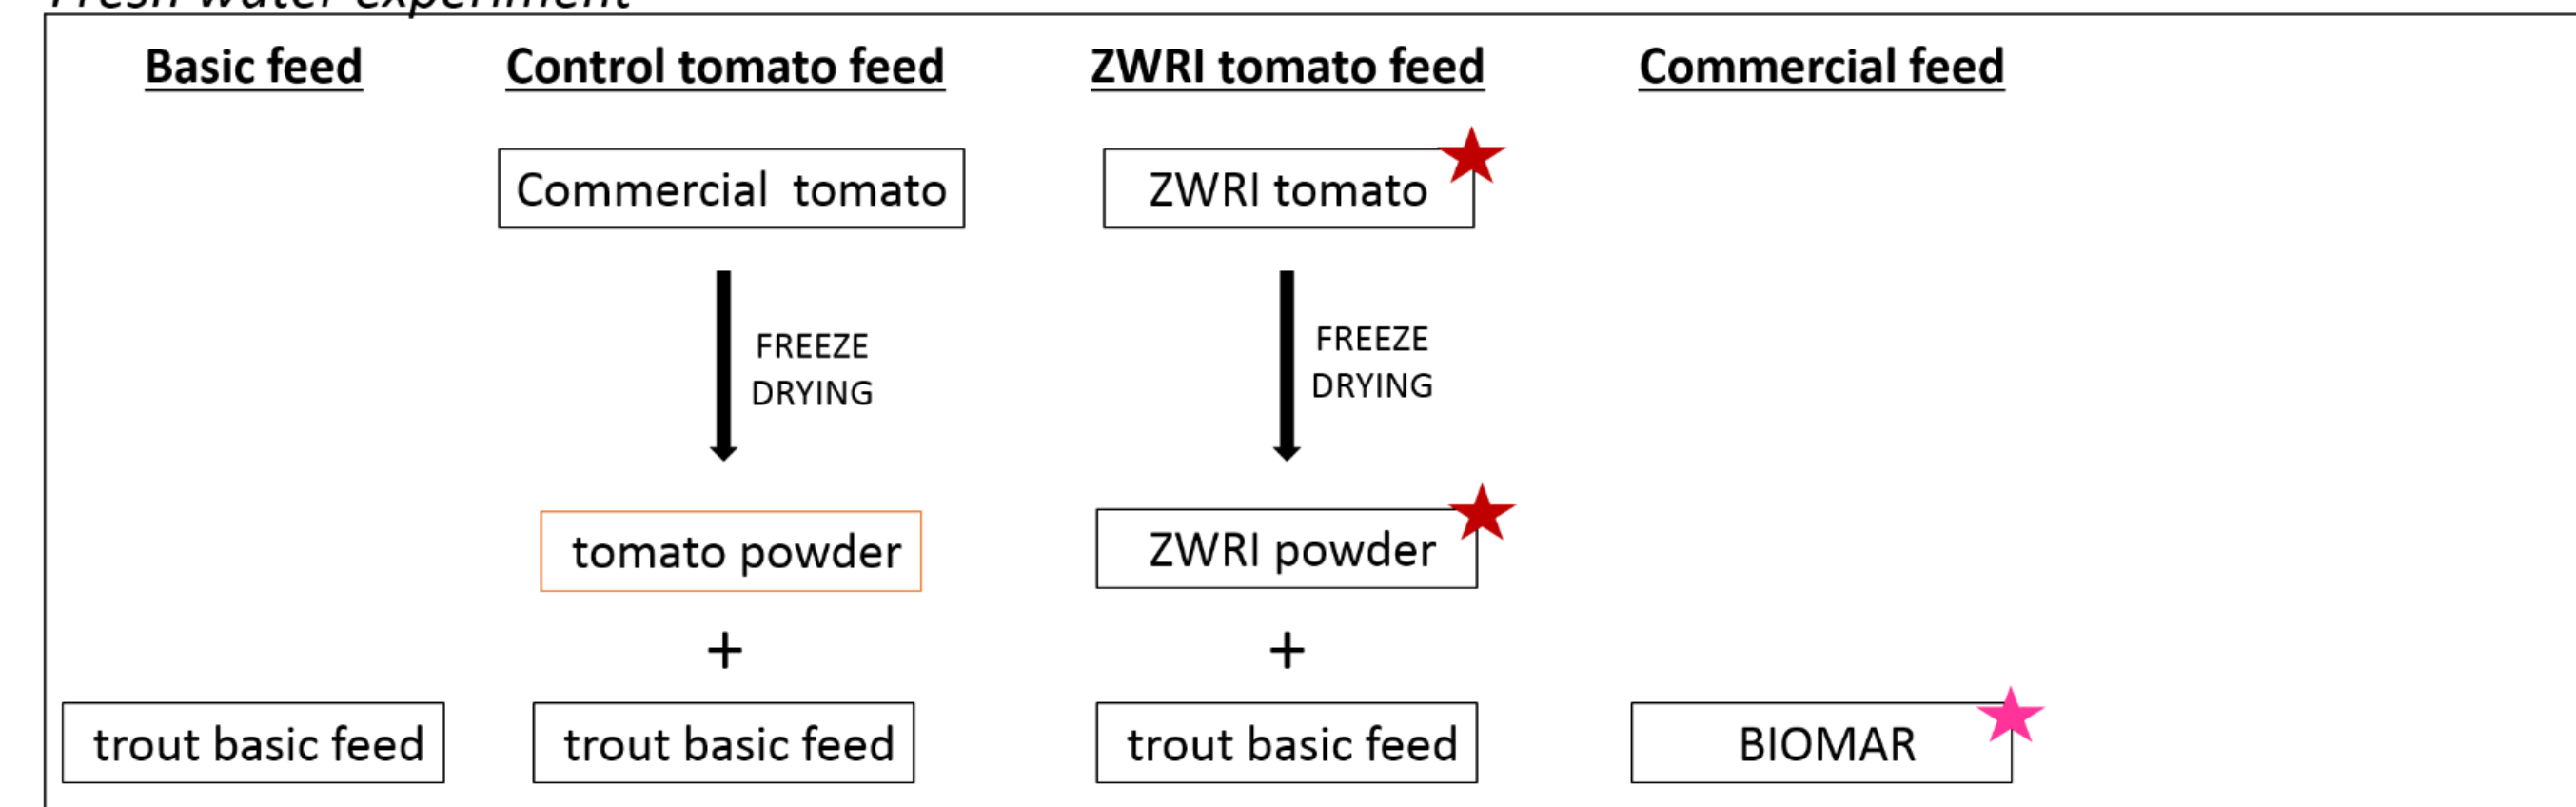

### Brackish water experiment

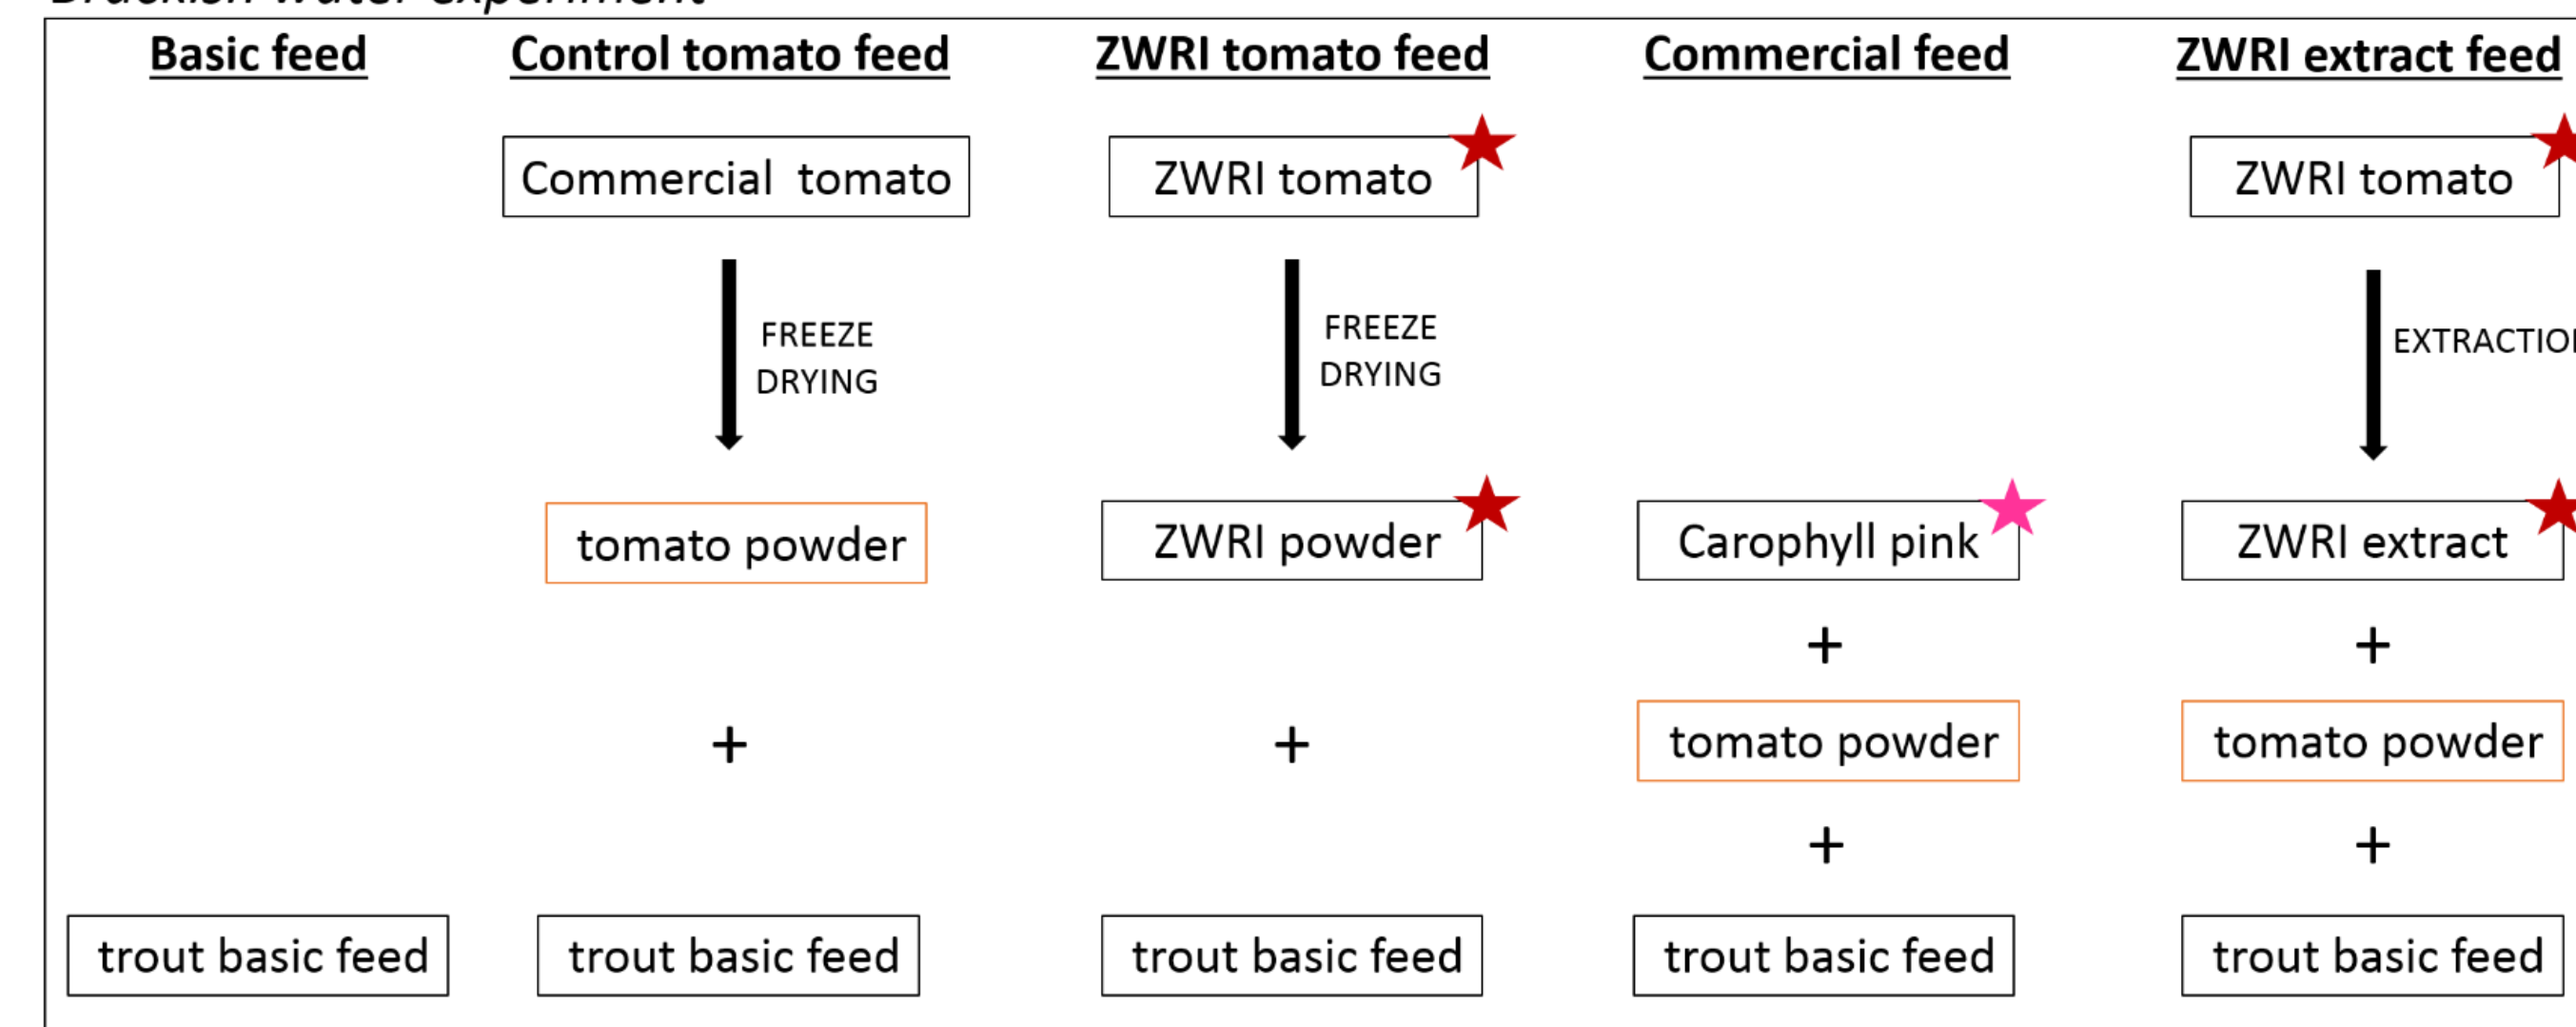

## b Tomato powders for feed

Control tomato powder

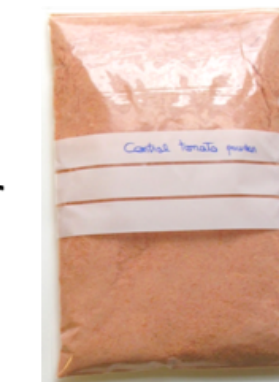

ZWRI tomato powder

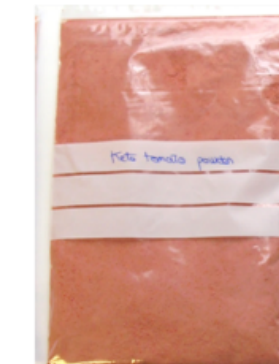

ZWRI extract mixed with control tomato powder

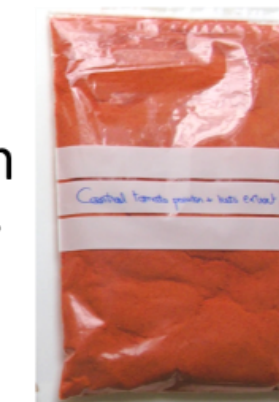

## c ZWRI extraction process

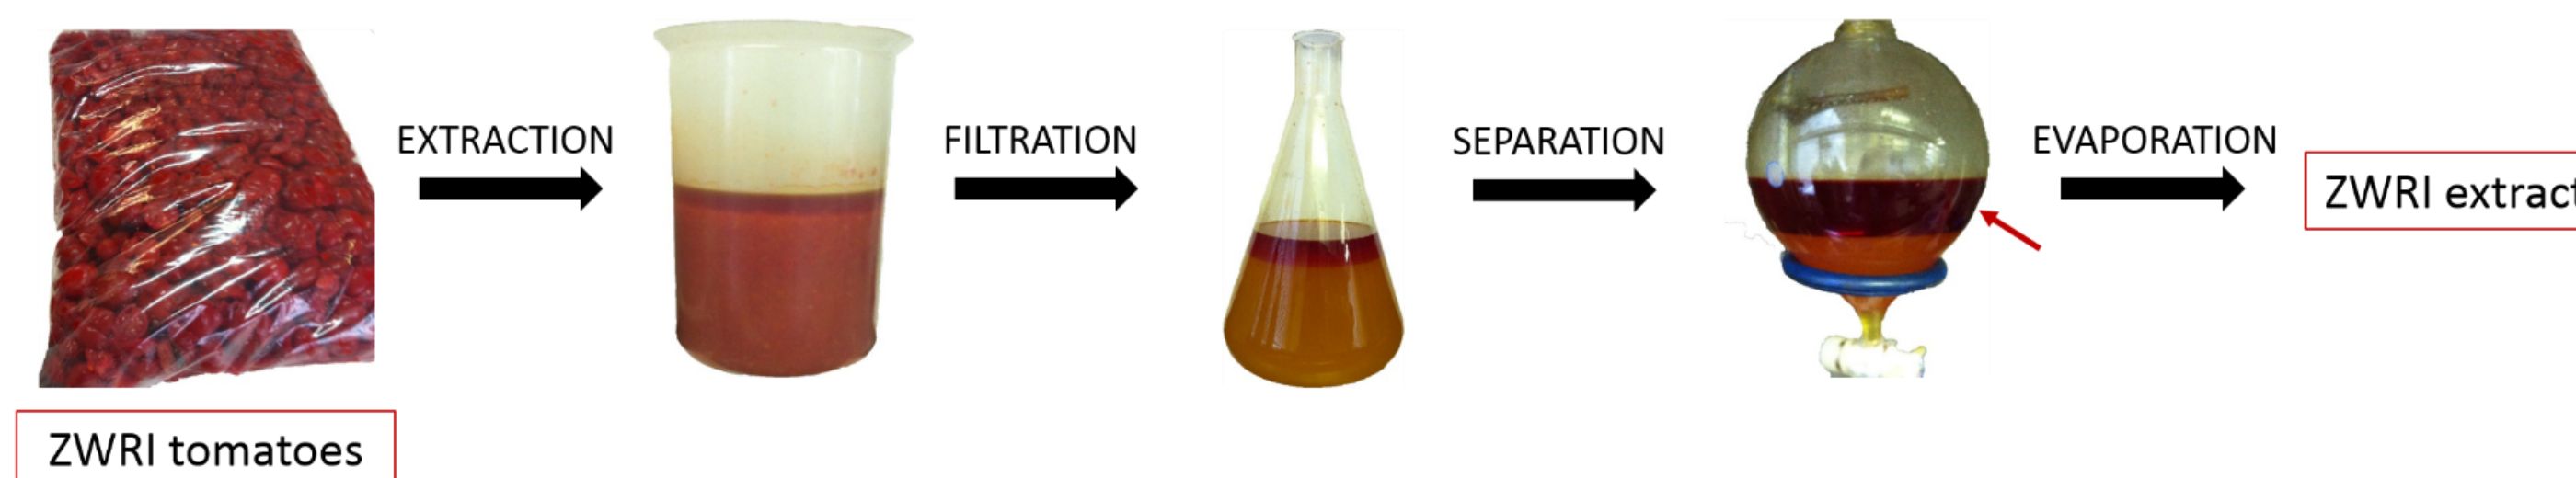

**Fig. S3** Feeds processing. (a) Description of the process and composition of the feeds used for the fresh and brackish water trout trials. The star denotes the presence of ketocarotenoids, in red the ZWRI tomato ketocarotenoids and in pink the commercial astaxanthin. (b) Freeze-dried tomato powders used for the feed making. Photographs of control tomato and ZWRI tomato powders as well as ZWRI extract mixed with control tomato powder are shown. (c) ZWRI extraction process. A series of photographs describe how the ZWRI extract was obtained from the ZWRI tomatoes. The red arrow points at the phase containing the ketocarotenoids.

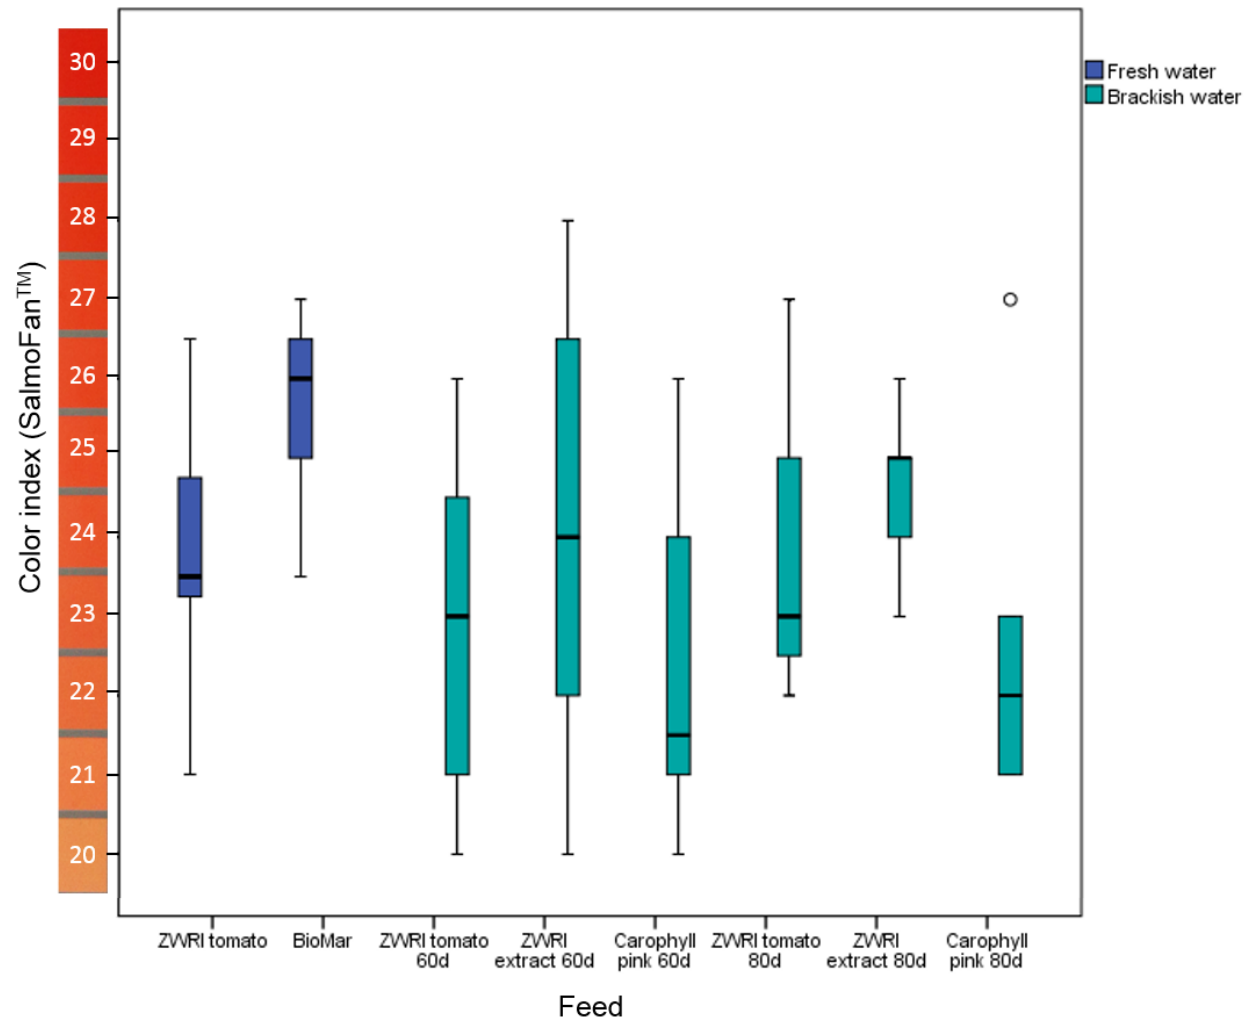

**Fig. S4** Trout fillet color measurement with SalmoFan™. At the end of each trial (fresh and brackish water), a color index was attributed to each trout fillet by direct comparison with a color fan. Commercial feeds used were BioMar and Carophyll pink ® for the fresh and brackish water trials, respectively. The data are represented as box-and-whisker plots. The lines in the boxes design the median and the whiskers depict the smallest and largest values. The circle represents an outlier defined by the SPSS statistical software. Fish that did not undergo normal development are not shown. N=15, N=10 and N=5 for the fresh water, brackish water (60 days) and (80 days) trials, respectively.

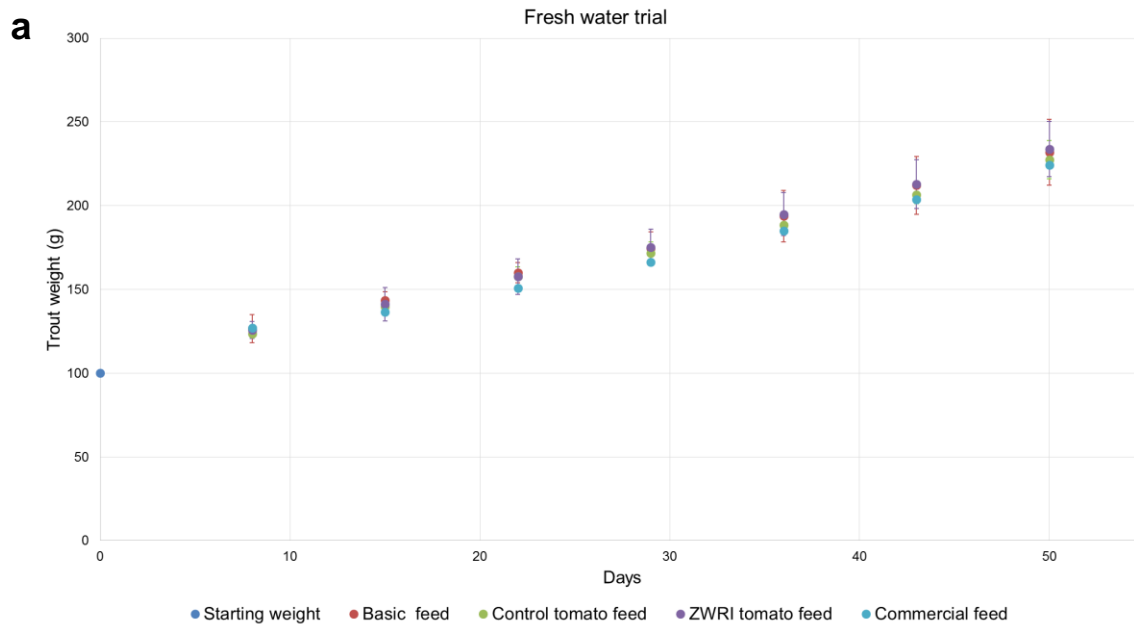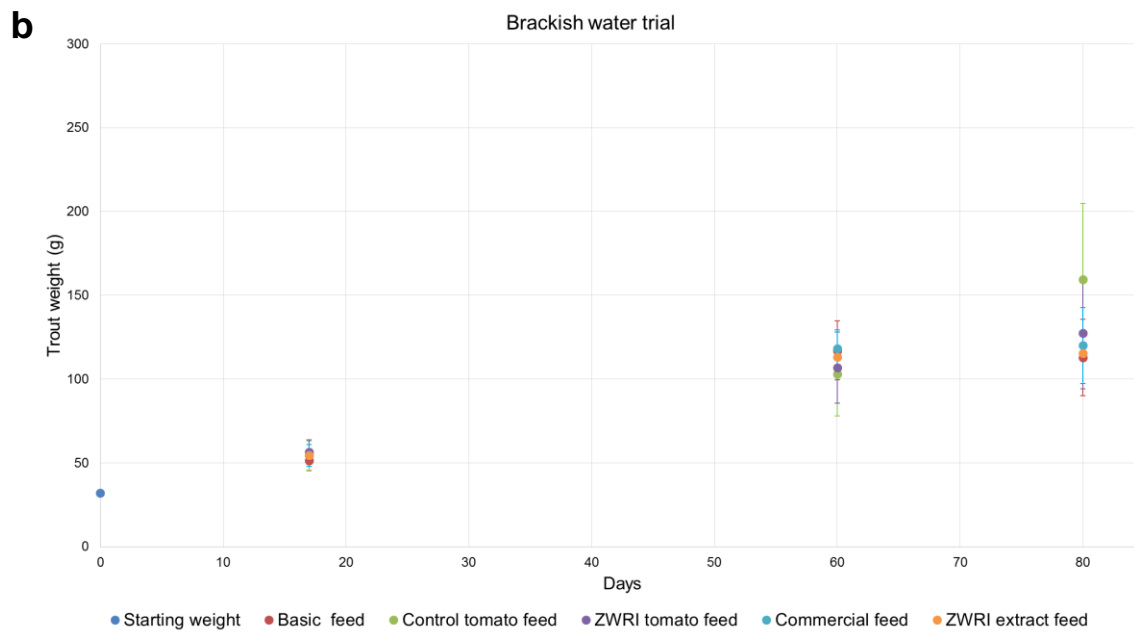

**Fig. S5** Trout weight throughout trials. Trout weight was measured per tank (N=3) in the fresh water trial and per individual in the brackish water trial (N=15 up to 60 days then N=5) at several time points during the trials. The mean data are represented  $\pm$  SD. No significant difference of trout weight was observed in the various feed treatments. Computed p-values for each comparison are tabulated in Table S7.

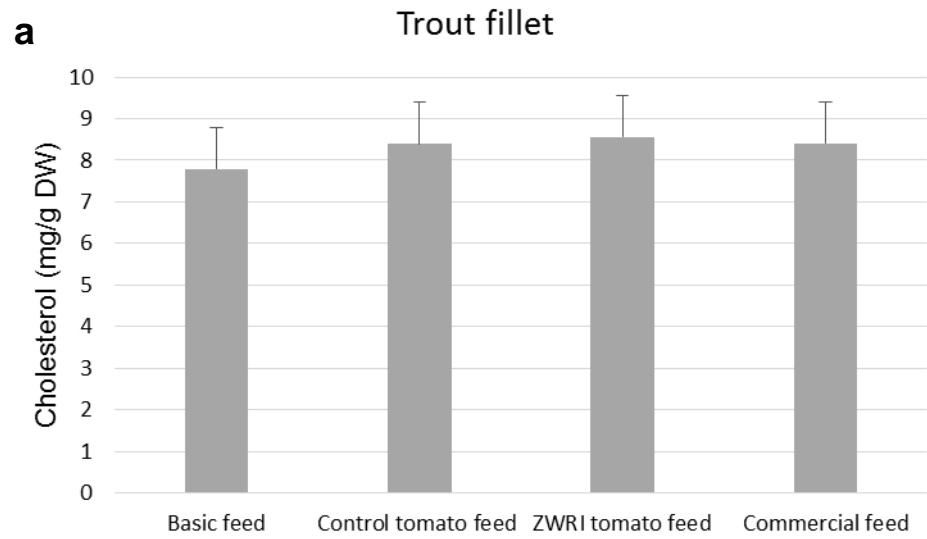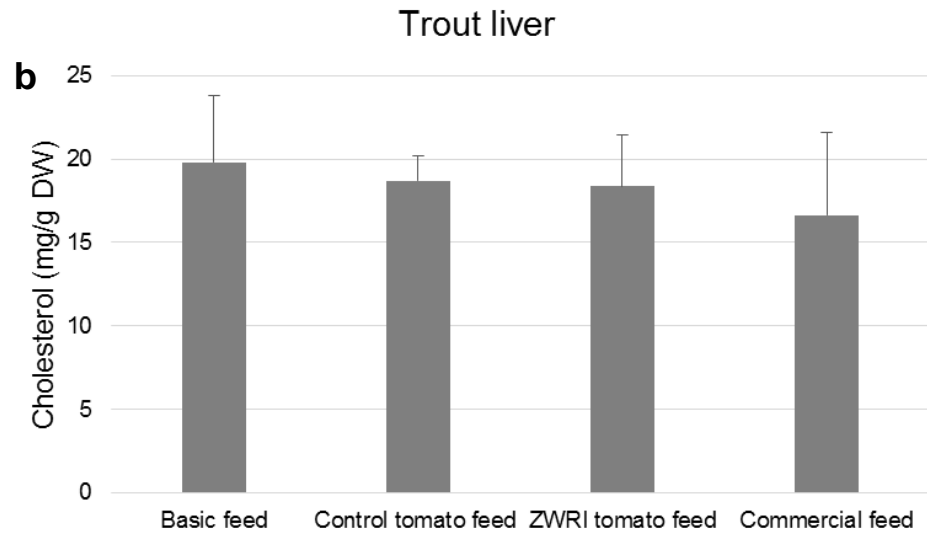

**Fig. S6** Cholesterol levels in trout fillets and livers. (a) Cholesterol levels in trout fillets of the fresh water trial. Cholesterol was quantified in 15 trout fillets for each feed treatment. (b) Cholesterol levels in trout livers of the fresh water trial. Livers were pooled per tank (N=10) and then analysed (N=3) for each feed treatment. The data are represented as mean  $\pm$  SD. No significant difference in cholesterol levels was observed in the fillets and livers from the various feed conditions. Computed p-values for each comparison are tabulated in Table S6.



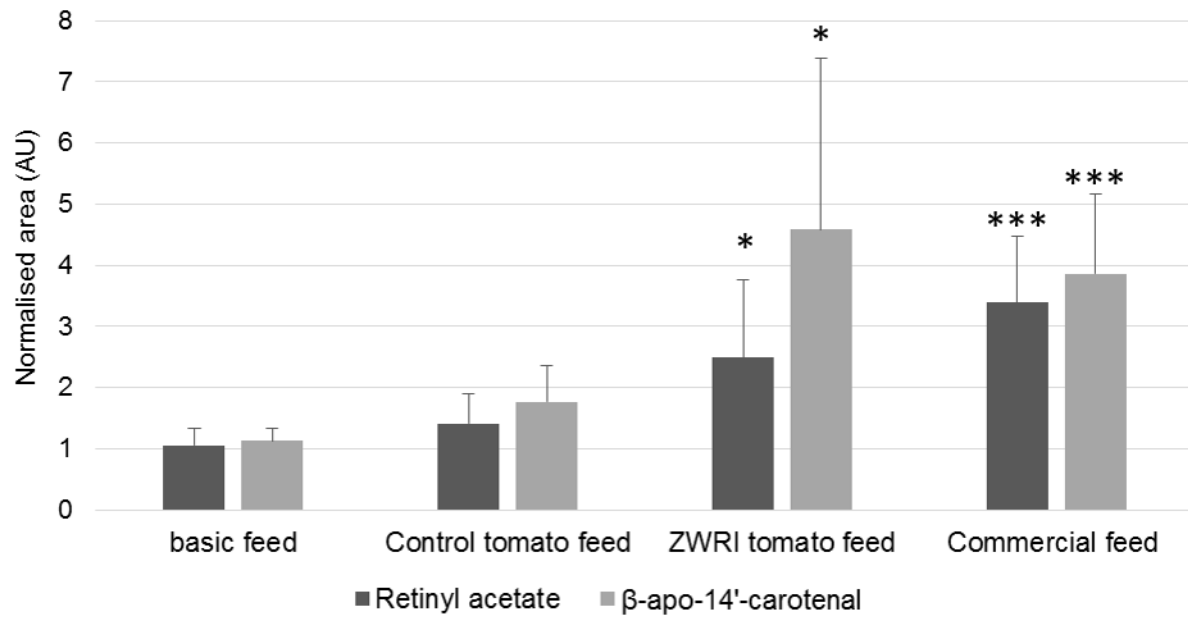

**Fig. S7** Retinyl acetate and  $\beta$ -apo-14'-carotenal levels in trout livers. Livers from trout of the fresh water trial were pooled per tank (N=10) and then analysed (N=3) for each feed treatment. The data are represented as mean  $\pm$  SD. The black stars indicate a significant difference compared to the basic feed. Computed p-values for each comparison are tabulated in Table S7. \*,  $P < 0.05$  and \*\*\*,  $P < 0.001$ .

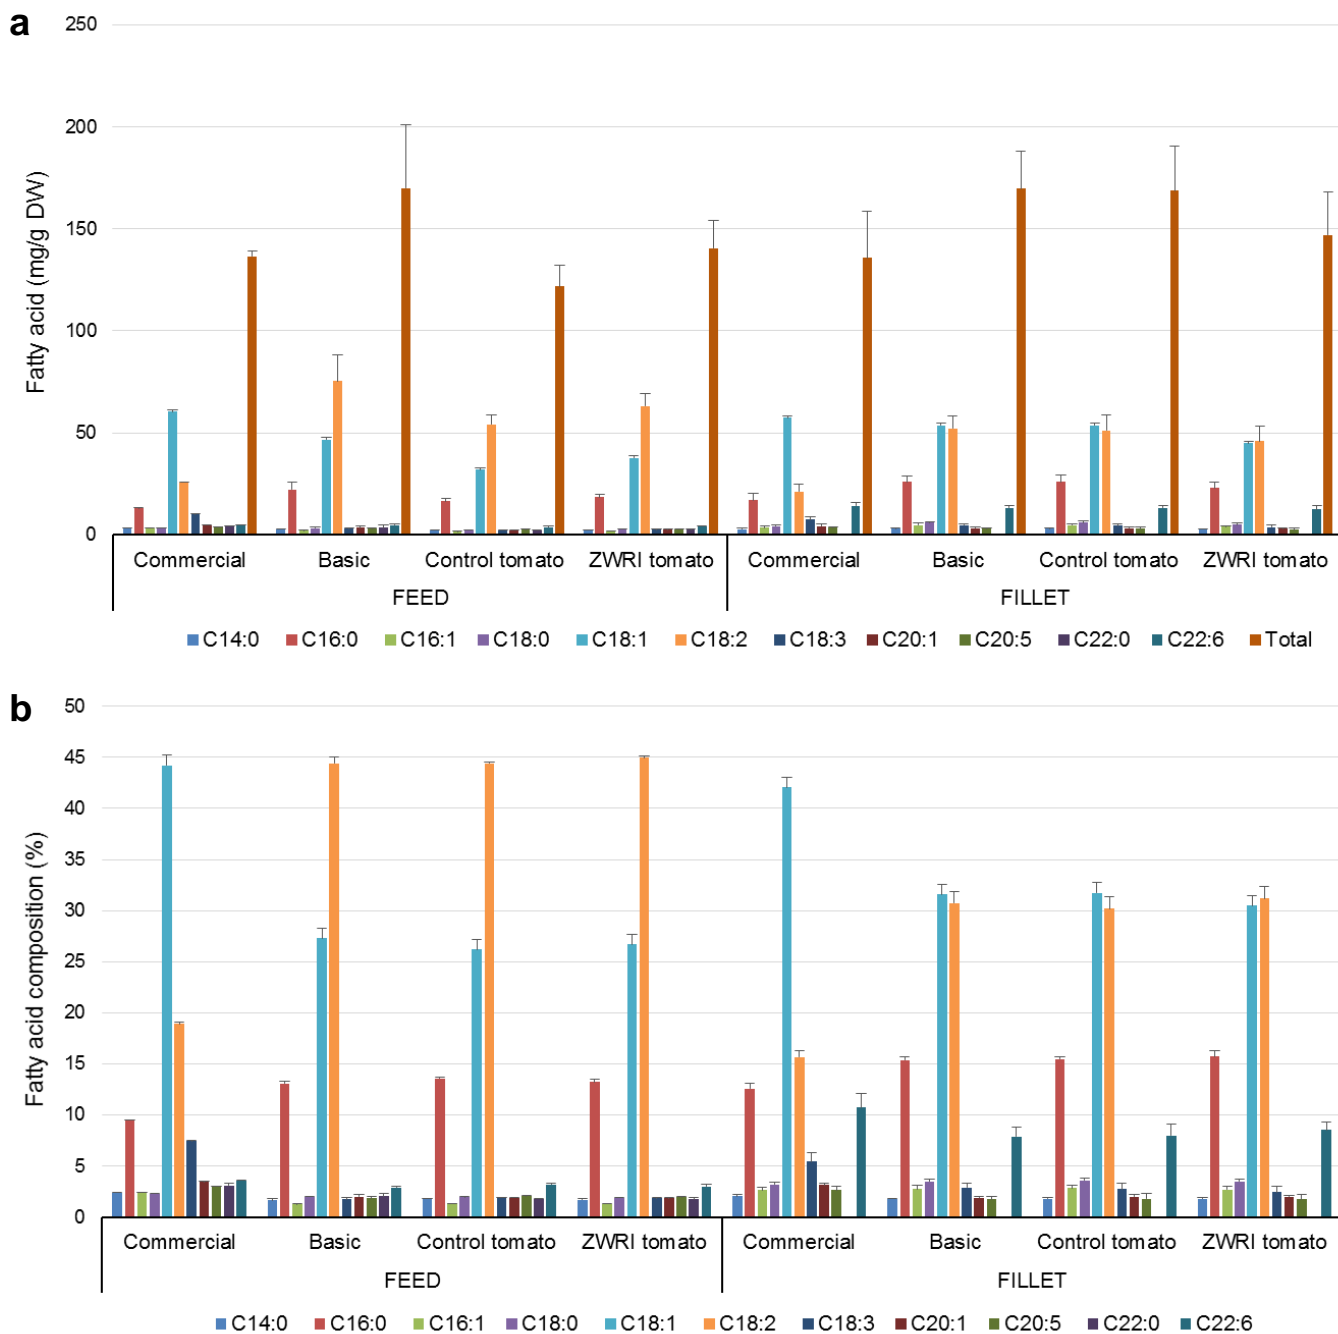

**Fig. S8** Fatty acid quantification and composition in feeds and trout fillets. (a) Fatty acid levels in the feeds and trout fillets of the fresh water trial. Fatty acid contents are presented as mg/g DW.

Computed p-values for each comparison are tabulated in Supplementary Table 6. (b) Fatty acid composition in the feeds and trout fillets of the fresh water trial. Fatty acids contents are presented as percentages. N=3 for the feeds and N=15 for the fish fillets.

The mean data are presented  $\pm$  SD. Computed p-values for each comparison are tabulated in Table S7.

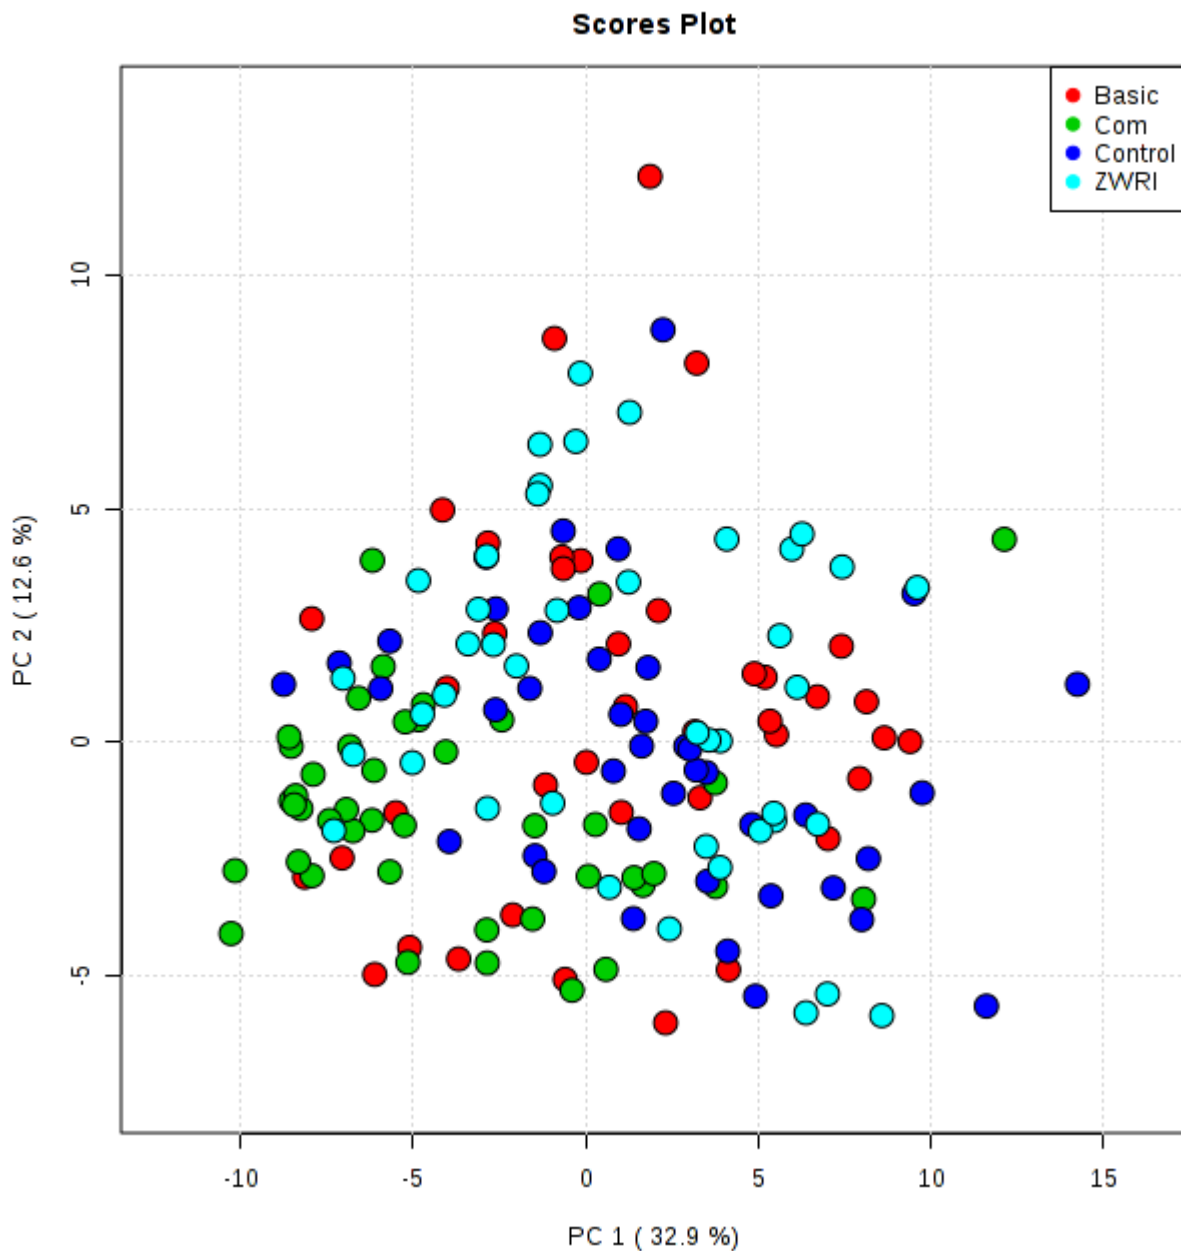

**Fig. S9** Principal components analysis of non polar compounds in trout fillets. Fillets of trout fed with four feeding treatments (Basic; basic feed, Com; commercial feed, Control; control tomato feed, ZWRI; ZWRI tomato feed) were compared based on 56 non polar compounds analysed by GC-MS. N=15. The different feeding treatments do not have an effect on the fillet compounds studied.

**Table S1. Carotenoid content in ZWRI tomato line and azygous controls grown in greenhouse or polytunnel condition**

| Carotenoid ( $\mu\text{g/g DW}$ ) | Greenhouse |           |          |           | Polytunnel |           |          |           | Standard tomato | %         |                   |           |                  |           |
|-----------------------------------|------------|-----------|----------|-----------|------------|-----------|----------|-----------|-----------------|-----------|-------------------|-----------|------------------|-----------|
|                                   | ZWØRIØ     | %         | ZWØRI    | %         | ZWRIØ      | %         | ZWRI     | %         |                 |           | ZWRI early season | %         | ZWRI late season | %         |
| Phytoene                          | 667±245    | <b>12</b> | 97±13    | <b>6</b>  | 68±22      | <b>2</b>  | 79±20    | <b>2</b>  | 77±7            | <b>3</b>  | 42±5              | <b>2</b>  | 36±5             | <b>2</b>  |
| Phytofluene                       | 644±173    | <b>11</b> | 111±10   | <b>7</b>  | 463±161    | <b>14</b> | 73±3     | <b>2</b>  | 84±3            | <b>3</b>  | 65±3              | <b>3</b>  | 296±93           | <b>13</b> |
| Neurosporene                      |            |           | 100±2    | <b>6</b>  |            |           |          |           |                 |           |                   |           |                  |           |
| <i>cis</i> -Lycopene              | 91±27      | <b>2</b>  |          |           |            |           |          |           |                 |           |                   |           | 73±11            | <b>3</b>  |
| Lycopene                          | 3859±625   | <b>68</b> | 61±18    | <b>4</b>  | 2543±411   | <b>77</b> |          |           |                 |           |                   |           | 1476±339         | <b>67</b> |
| $\gamma$ -Carotene                | 72±7       | <b>1</b>  | 72±4     | <b>4</b>  |            |           |          |           |                 |           |                   |           | 78±1             | <b>4</b>  |
| $\beta$ -Cryptoxanthin            |            |           |          |           | 48±13      | <b>1</b>  |          |           |                 |           |                   |           |                  |           |
| $\beta$ -Carotene                 | 205±86     | <b>4</b>  | 1112±122 | <b>66</b> | 41±3       | <b>1</b>  | 266±54   | <b>8</b>  | 390±34          | <b>14</b> | 11±2              | <b>8</b>  | 120±8            | <b>5</b>  |
| $\delta$ -Carotene                |            |           |          |           | 51±6       | <b>2</b>  |          |           |                 |           |                   |           | 86±1             | <b>4</b>  |
| Lutein                            | 155±11     | <b>3</b>  | 143±7    | <b>8</b>  |            |           |          |           |                 |           |                   |           | 151±27           | <b>7</b>  |
| Echinenone                        |            |           |          |           |            |           | 76±10    | <b>2</b>  | 96±9            | <b>3</b>  | 54±7              | <b>3</b>  |                  |           |
| 3-OH-Echinenone                   |            |           |          |           |            |           | 17±2     | <b>1</b>  | 19±3            | <b>1</b>  | 12±1              | <b>1</b>  |                  |           |
| 3'-OH-Echinenone                  |            |           |          |           |            |           | 125±19   | <b>4</b>  | 105±46          | <b>4</b>  | 98±14             | <b>5</b>  |                  |           |
| Canthaxanthin                     |            |           |          |           | 8±8        | <b>0</b>  | 899±151  | <b>28</b> | 873±62          | <b>31</b> | 634±144           | <b>32</b> |                  |           |
| Phoenicoxanthin                   |            |           |          |           | 15±6       | <b>0</b>  | 594±142  | <b>18</b> | 478±27          | <b>17</b> | 335±54            | <b>17</b> |                  |           |
| Astaxanthin                       |            |           |          |           | 47±9       | <b>1</b>  | 83±15    | <b>3</b>  | 80±4            | <b>3</b>  | 47±4              | <b>2</b>  |                  |           |
| Phoenicoxanthin-C14:0             |            |           |          |           | nq         |           | 553±79   | <b>17</b> | 300±20          | <b>11</b> | 183±38            | <b>9</b>  |                  |           |
| Phoenicoxanthin-C16:0             |            |           |          |           | nq         |           | 298±54   | <b>9</b>  | 174±21          | <b>6</b>  | 209±76            | <b>11</b> |                  |           |
| Adonixanthin-C14:1                |            |           |          |           |            |           | 130±27   | <b>4</b>  | 106±14          | <b>4</b>  | 72±27             | <b>4</b>  |                  |           |
| Adonixanthin-C16:1                |            |           |          |           |            |           | 71±18    | <b>2</b>  | 63±16           | <b>3</b>  | 57±7              | <b>3</b>  |                  |           |
| Total ketocarotenoids             | 0          | <b>0</b>  | 0        | <b>0</b>  | 74±30      | <b>2</b>  | 2845±353 | <b>87</b> | 2294±163        | <b>81</b> | 1701±252          | <b>86</b> | 0                | <b>0</b>  |
| Total                             | 5693±805   |           | 1697±105 |           | 3287±341   |           | 3263±398 |           | 2846±185        |           | 1971±275          |           | 2217±572         |           |
| <i>N</i>                          | 3          |           | 3        |           | 5          |           | 4        |           | 4               |           | 4                 |           | 3                |           |

Carotenoid levels are represented as  $\mu\text{g/g}$  dry weight and in bold figures as percentages. Three representative fruits of *N* plants were used. The fruits were respectively pooled and three determinations were made. The mean data are shown as  $\pm$  SD. Nq signifies that a compound has been detected but it is under the level of quantification. Polytunnel condition are defined by a polytunnel structure, without extra heating and lighting. Computed p-values for the comparison of ZWRI tomatoes grown in the greenhouse and the polytunnel are tabulated in Table S7.

**Table S2. Composition of the feeds used in the fresh and brackish water trout trials.**

|                                              | Fresh water experiment |                |             |              | Brackish water experiment |                |             |              |             |
|----------------------------------------------|------------------------|----------------|-------------|--------------|---------------------------|----------------|-------------|--------------|-------------|
|                                              | Basic                  | Control tomato | ZWRI tomato | Commercial   | Basic                     | Control tomato | ZWRI tomato | ZWRI extract | Commercial  |
| Basic feed (g)#                              | 1000.0                 | 1000.0         | 1000.0      | 1000.0       | 1000.0                    | 1000.0         | 1000.0      | 1000.0       | 1000.0      |
| Cellulose (g)                                | 33.6                   | 0              | 0.0         | 0.0          | 0.0                       | 0.0            | 0.0         | 0.0          | 0.0         |
| Control tomato powder (g)                    | 0.0                    | 33.6           | 0.0         | 0.0          | 0.0                       | 38.0           | 0.0         | 37.2         | 37.6        |
| ZWRI tomato powder (g)                       | 0.0                    | 0.0            | 33.6        | 0.0          | 0.0                       | 0.0            | 38.0        | 0.0          | 0.0         |
| ZWRI extract (g)                             | 0.0                    | 0.0            | 0.0         | 0.0          | 0.0                       | 0.0            | 0.0         | 0.8          | 0.0         |
| Carophyll pink® (g)                          | 0.0                    | 0.0            | 0.0         | 0.0          | 0.0                       | 0.0            | 0.0         | 0.0          | 0.4         |
| <b>Expected ketocarotenoids (mg/kg DW)</b>   | <b>0.0</b>             | <b>0.0</b>     | <b>75.0</b> | <b>75.0</b>  | <b>0.0</b>                | <b>0.0</b>     | <b>80.0</b> | <b>80.0</b>  | <b>80.0</b> |
| <b>Quantified ketocarotenoids (mg/kg DW)</b> | <b>0.0</b>             | <b>0.0</b>     | <b>35.6</b> | <b>143.6</b> | <b>0.0</b>                | <b>0.0</b>     | <b>40.1</b> | <b>59.8</b>  | <b>42.0</b> |

Data are expressed as g or mg/kg dry weight. # Basic feeds used for the basic and commercial treatment of the fresh water trial and the basic treatment of the brackish water trial are described in Supplementary Table 3. ZWRI tomato powder and ZWRI extract contained 2.1 mg/g DW and 9.6% of coloring ketocarotenoids, respectively. The Carophyll pink® granules batch used included 18% of coloring ketocarotenoids (15% of astaxanthin and 3% of unknown ketocarotenoid-1).

**Table S3. Composition and proximal analysis of the basic feeds used in the fresh and brackish water trout trials.**

**a**

|                      | Fresh | Brackish |
|----------------------|-------|----------|
| Wheat Gluten         | 18.5  |          |
| Fish Meal            | 41.7  | 43.5     |
| Corn Oil (Mazola)    | 13.9  |          |
| Canola oil           |       | 7.6      |
| Fish Oil             | 3.2   | 15.3     |
| Dextrin              | 9.3   |          |
| Cellulose            | 0.4   |          |
| Wheat starch         | 9.3   |          |
| Wheat flour          |       | 10.0     |
| Poultry viscera meal |       | 13.0     |
| Feather meal         |       | 8.0      |
| Minerals             | 1.9   | 0.4      |
| Vitamins             | 0.9   | 2.0      |
| TiO <sub>2</sub>     | 0.9   |          |
| Stay-C               | 0.1   |          |

Composition of the basic feeds. Data are represented as percentage.

**b**

|                                 | Fresh      |                 | Brackish   |
|---------------------------------|------------|-----------------|------------|
|                                 | Basic feed | Commercial feed | Basic feed |
| Crude protein (%)               | 42.1       | 40-43           | 44.2       |
| Crude lipid (%)                 | 22.1       | 20-23           | 24.5       |
| Carbohydrates (%)               |            | 21              | 5.4        |
| Fibre (%)                       |            | 4,2             | 7.9        |
| Ash (%)                         |            | 6,0             | 8.7        |
| Total phosphorus (%)            |            | 0,8             |            |
| Typical content of nitrogen (%) |            | 6,6             |            |
| Humidity (%)                    |            |                 | 9.4        |
| Digestible Energy (MJ/kg)       | 16.8       | 18,3            |            |
| Gross energy (MJ/kg)            |            | 20-23           |            |
| Energy (Kcal)                   |            |                 | 418.3      |

Proximal analysis of the basic feeds. Proximal analysis of basic feeds used for the fresh and brackish water experiments are shown as well as the one of the commercial feed (BioMar) used in the fresh water trial (as it was not made with the “self-made” basic feed used for the other treatments).

**Table S4. Carotenoid content in feeds utilised for the fresh and brackish trout trials**

| Carotenoid ( $\mu\text{g/g DW}$ ) | Basic         |               | Control tomato |                | ZWRI tomato    |                | ZWRI extract    | Commercial       |                |
|-----------------------------------|---------------|---------------|----------------|----------------|----------------|----------------|-----------------|------------------|----------------|
|                                   | Fresh         | Brackish      | Fresh          | Brackish       | Fresh          | Brackish       | Brackish        | Fresh            | Brackish       |
| Lycopene                          |               |               | 15.3 $\pm$ 0.6 | 23.5 $\pm$ 1.3 |                |                | 27.6 $\pm$ 1.8  |                  | 19.5 $\pm$ 0.7 |
| $\beta$ -Carotene                 |               |               | 5.8 $\pm$ 0.3  | 6.9 $\pm$ 0.2  | 11.3 $\pm$ 0.6 | 12.6 $\pm$ 0.3 | 15.5 $\pm$ 0.2  |                  | 6.7 $\pm$ 0.0  |
| Lutein                            | 0.5 $\pm$ 0.0 | 0.2 $\pm$ 0.0 | 1.2 $\pm$ 0.1  | 0.6 $\pm$ 0.0  | 0.3 $\pm$ 0.0  | 0.1 $\pm$ 0.0  | 0.6 $\pm$ 0.2   | 10.4 $\pm$ 4.6   |                |
| Echinenone                        |               |               |                |                | 2.4 $\pm$ 0.3  | 3.0 $\pm$ 0.1  | 3.3 $\pm$ 0.0   |                  |                |
| 3-OH-Echinenone                   |               |               |                |                | 1.0 $\pm$ 0.2  | 0.2 $\pm$ 0.0  | 0.2 $\pm$ 0.0   |                  |                |
| 3'-OH-Echinenone                  |               |               |                |                | 2.0 $\pm$ 0.2  | 3.6 $\pm$ 0.1  | 4.7 $\pm$ 0.2   |                  |                |
| Canthaxanthin                     |               |               |                |                | 8.9 $\pm$ 1.5  | 12.4 $\pm$ 0.2 | 16.8 $\pm$ 0.4  |                  |                |
| Phoenicoxanthin                   |               |               |                |                | 5.6 $\pm$ 1.2  | 8.2 $\pm$ 0.2  | 11.9 $\pm$ 0.3  |                  |                |
| Astaxanthin                       |               |               |                |                | 1.8 $\pm$ 0.3  | 1.6 $\pm$ 0.3  | 1.6 $\pm$ 0.1   | 132.8 $\pm$ 15.4 | 39.2 $\pm$ 0.5 |
| Phoenicoxanthin-C14:0             |               |               |                |                | 4.5 $\pm$ 1.3  | 4.6 $\pm$ 0.1  | 10.1 $\pm$ 0.4  |                  |                |
| Phoenicoxanthin-C16:0             |               |               |                |                | 2.0 $\pm$ 0.5  | 2.0 $\pm$ 0.1  | 4.2 $\pm$ 0.1   |                  |                |
| Adonixanthin-C14:1                |               |               |                |                | 5.3 $\pm$ 0.5  | 2.7 $\pm$ 0.2  | 4.5 $\pm$ 0.3   |                  |                |
| Adonixanthin-C16:1                |               |               |                |                | 2.0 $\pm$ 0.3  | 1.9 $\pm$ 0.1  | 2.5 $\pm$ 0.2   |                  |                |
| Unknown keto-1                    |               |               |                |                |                |                |                 | 10.8 $\pm$ 1.1   | 2.8 $\pm$ 0.3  |
| Total ketocarotenoids             |               |               |                |                | 35.6 $\pm$ 5.6 | 40.1 $\pm$ 1.3 | 59.8 $\pm$ 0.9  | 143.6 $\pm$ 16.5 | 42.0 $\pm$ 0.2 |
| TOTAL                             | 0.5 $\pm$ 0.0 | 0.2 $\pm$ 0.0 | 22.2 $\pm$ 0.7 | 31.0 $\pm$ 1.5 | 47.2 $\pm$ 5.9 | 52.9 $\pm$ 1.6 | 103.5 $\pm$ 2.4 | 154.0 $\pm$ 17.5 | 68.2 $\pm$ 0.5 |
| <i>N</i>                          | 6             | 5             | 6              | 5              | 6              | 5              | 5               | 6                | 5              |

The feeds (basic, control tomato, ZWRI tomato, ZWRI extract and commercial) were analysed at the end of each trial (50 and 80 days for the fresh and brackish water experiments, respectively). Data are shown as  $\mu\text{g/g}$  dry weight. *N* represents the number of feed batch analysed. They were studied in three technical replicates each. Keto, ketocarotenoid.



**Table S5. Carotenoid content in trout fillet from the fresh and brackish water experiments**

| Carotenoid ( $\mu\text{g/g DW}$ ) | Basic feed    |               |               | Control tomato feed |               |               | ZWRI tomato feed |               |               | ZWRI extract feed |               | Commercial feed |               |               |          |  |
|-----------------------------------|---------------|---------------|---------------|---------------------|---------------|---------------|------------------|---------------|---------------|-------------------|---------------|-----------------|---------------|---------------|----------|--|
|                                   | Fresh         |               | Brackish      | Fresh               |               | Brackish      | Fresh            |               | Brackish      |                   | Brackish      |                 | Fresh         |               | Brackish |  |
|                                   | 50d           | 60d           | 80d           | 50d                 | 60d           | 80d           | 50d              | 60d           | 80d           | 60d               | 80d           | 50d             | 60d           | 80d           |          |  |
| Lutein                            | 0.4 $\pm$ 0.3 | 0.1 $\pm$ 0.0 | 0.0 $\pm$ 0.0 | 0.9 $\pm$ 0.5       | 0.1 $\pm$ 0.0 | 0.1 $\pm$ 0.1 | 0.5 $\pm$ 0.3    | nq            | nq            | nq                | nq            | 0.7 $\pm$ 0.3   | nq            | nq            |          |  |
| Echinenone                        |               |               |               |                     |               |               | 0.1 $\pm$ 0.0    | nq            | nq            | nq                | nq            |                 |               |               |          |  |
| 3'-OH-Echinenone                  |               |               |               |                     |               |               | 0.2 $\pm$ 0.1    | 0.2 $\pm$ 0.1 | 0.4 $\pm$ 0.2 | 0.4 $\pm$ 0.2     | 0.3 $\pm$ 0.1 |                 |               |               |          |  |
| Canthaxanthin                     |               |               |               |                     |               |               | 3.9 $\pm$ 1.9    | 2.2 $\pm$ 1.0 | 4.2 $\pm$ 2.8 | 3.9 $\pm$ 2.2     | 3.4 $\pm$ 1.1 |                 |               |               |          |  |
| Phoenicoxanthin                   |               |               |               |                     |               |               | 7.1 $\pm$ 4.0    | 0.5 $\pm$ 0.6 | 2.4 $\pm$ 2.8 | 2.6 $\pm$ 2.5     | 2.4 $\pm$ 1.3 |                 |               |               |          |  |
| Astaxanthin                       |               |               |               |                     |               |               | 2.9 $\pm$ 1.5    | 0.8 $\pm$ 0.4 | 0.8 $\pm$ 0.5 | 0.8 $\pm$ 0.3     | 0.7 $\pm$ 0.2 | 35.5 $\pm$ 11.5 | 7.8 $\pm$ 3.0 | 6.4 $\pm$ 3.4 |          |  |
| Unknown keto-1                    |               |               |               |                     |               |               |                  |               |               |                   |               | 0.8 $\pm$ 0.3   | 0.7 $\pm$ 0.3 | 0.4 $\pm$ 0.2 |          |  |
| Total ketocarotenoids             |               |               |               |                     |               |               | 14.2 $\pm$ 7.4   | 3.8 $\pm$ 2.1 | 7.8 $\pm$ 6.2 | 7.7 $\pm$ 5.2     | 6.8 $\pm$ 2.6 | 36.3 $\pm$ 11.7 | 8.5 $\pm$ 3.3 | 6.9 $\pm$ 3.6 |          |  |
| TOTAL                             | 0.4 $\pm$ 0.3 | 0.1 $\pm$ 0.0 | 0.0 $\pm$ 0.0 | 0.9 $\pm$ 0.5       | 0.1 $\pm$ 0.0 | 0.1 $\pm$ 0.1 | 14.7 $\pm$ 7.7   | 3.8 $\pm$ 2.1 | 7.8 $\pm$ 6.2 | 7.8 $\pm$ 5.3     | 6.9 $\pm$ 2.7 | 37.0 $\pm$ 11.9 | 8.5 $\pm$ 3.3 | 6.9 $\pm$ 3.6 |          |  |
| <i>N</i>                          | 15            | 10            | 5             | 15                  | 10            | 5             | 15               | 10            | 5             | 10                | 5             | 15              | 10            | 5             |          |  |

The trout fillet from the trout (50 day old and 60 or 80 day old for the fresh and brackish water trials, respectively) fed with the basic, control tomato, ZWRI tomato, ZWRI extract and commercial feed treatments were analysed. Data are shown as  $\mu\text{g/g}$  dry weight. *N* represents the number of trout fillet analysed. They were studied in three technical replicates each. Keto, ketocarotenoid.

**Table S6. Carotenoid content in trout liver, eye and feces**

| Carotenoid ( $\mu\text{g/g DW}$ ) | Liver |                |             |                | Eye        |                  |             |               | Feces         |                |               |                |                |            |                  |            |
|-----------------------------------|-------|----------------|-------------|----------------|------------|------------------|-------------|---------------|---------------|----------------|---------------|----------------|----------------|------------|------------------|------------|
|                                   | Basic | Control tomato | ZWRI tomato | Commercial     | Basic      | Control tomato   | ZWRI tomato | Commercial    | Basic         | Control tomato | ZWRI tomato   | Commercial     |                |            |                  |            |
| Lycopene                          |       | 3.0 $\pm$ 0.3  | <b>20</b>   | 2.7 $\pm$ 0.2  |            |                  |             |               |               | 19.8 $\pm$ 1.6 | <b>130</b>    |                |                |            |                  |            |
| $\beta$ -Carotene                 |       | 2.5 $\pm$ 0.1  | <b>43</b>   | 3.3 $\pm$ 0.2  |            |                  | <b>29</b>   |               |               | 14.1 $\pm$ 0.4 | <b>245</b>    | 21.7 $\pm$ 0.9 | <b>192</b>     |            |                  |            |
| Lutein                            |       |                |             |                |            |                  |             |               | 0.7 $\pm$ 0.1 | <b>135</b>     | 0.9 $\pm$ 0.2 | <b>80</b>      | 1.1 $\pm$ 0.1  | <b>315</b> | 9.2 $\pm$ 0.3    | <b>88</b>  |
| Echinenone                        |       |                |             | 0.7 $\pm$ 0.1  |            |                  | <b>30</b>   |               |               |                |               |                | 5.2 $\pm$ 0.2  | <b>221</b> |                  |            |
| 3-OH-Echinenone                   |       |                |             |                |            |                  |             |               |               |                |               |                | 4.0 $\pm$ 0.2  | <b>405</b> |                  |            |
| 3'-OH-Echinenone                  |       |                |             | 0.7 $\pm$ 0.0  |            |                  | <b>35</b>   |               |               |                |               |                | 6.2 $\pm$ 0.2  | <b>312</b> |                  |            |
| Canthaxanthin                     |       |                |             | 0.4 $\pm$ 0.1  |            |                  | <b>5</b>    |               |               |                |               |                | 0.2 $\pm$ 0.1  | <b>3</b>   |                  |            |
| Phoenicoxanthin                   |       |                |             | 0.1 $\pm$ 0.0  |            |                  | <b>1</b>    |               |               |                |               |                | 0.0 $\pm$ 0.0  | <b>0</b>   |                  |            |
| Astaxanthin                       |       |                |             | 0.4 $\pm$ 0.0  | <b>19</b>  | 8.3 $\pm$ 1.3    | <b>6</b>    |               |               |                |               |                | 2.7 $\pm$ 0.2  | <b>2</b>   |                  |            |
| Phoenicoxanthin-C14:0             |       |                |             |                |            |                  |             |               |               |                |               |                | 6.4 $\pm$ 1.0  | <b>351</b> | 223.1 $\pm$ 12.9 | <b>168</b> |
| Phoenicoxanthin-C16:0             |       |                |             |                |            |                  |             |               |               |                |               |                | 0.3 $\pm$ 0.1  | <b>7</b>   |                  |            |
| Adonixanthin-C14:1                |       |                |             |                |            |                  |             |               |               |                |               |                | 0.1 $\pm$ 0.0  | <b>7</b>   |                  |            |
| Adonixanthin-C16:1                |       |                |             |                |            |                  |             |               |               |                |               |                | 3.0 $\pm$ 0.9  | <b>57</b>  |                  |            |
| Unknown keto-1                    |       |                |             |                |            | 1.8 $\pm$ 0.2    | <b>17</b>   |               |               |                |               |                | 0.8 $\pm$ 0.2  | <b>39</b>  |                  |            |
| Total coloring keto.              |       |                |             |                |            |                  |             | 1.8 $\pm$ 0.2 | <b>17</b>     |                |               |                | 0.1 $\pm$ 0.0  | <b>1</b>   | 12.9 $\pm$ 0.4   | <b>119</b> |
| Total keto.                       |       |                |             | 0.9 $\pm$ 0.2  | <b>4</b>   | 8.3 $\pm$ 1.3    | <b>6</b>    |               |               |                |               |                | 0.3 $\pm$ 0.1  | <b>1</b>   | 2.7 $\pm$ 0.2    | <b>2</b>   |
| TOTAL                             |       |                |             | 0.3 $\pm$ 0.1  | <b>1</b>   | 2.8 $\pm$ 0.2    | <b>2</b>    |               |               |                |               |                | 0.3 $\pm$ 0.1  | <b>1</b>   | 2.8 $\pm$ 0.2    | <b>2</b>   |
|                                   |       |                |             | 0.7 $\pm$ 0.1  | <b>135</b> | 34.9 $\pm$ 2.0   | <b>157</b>  |               |               |                |               |                | 0.7 $\pm$ 0.1  | <b>135</b> | 34.9 $\pm$ 2.0   | <b>157</b> |
|                                   |       |                |             | 73.1 $\pm$ 3.1 | <b>155</b> | 245.4 $\pm$ 13.3 | <b>159</b>  |               |               |                |               |                | 73.1 $\pm$ 3.1 | <b>155</b> | 245.4 $\pm$ 13.3 | <b>159</b> |
| <i>N</i>                          | 3     | 3              | 3           | 3              | 3          | 3                | 3           | 3             | 3             | 3              | 3             | 3              | 3              | 3          | 3                | 3          |

Data are presented for the trout from the fresh water trial. Carotenoid content is displayed as  $\mu\text{g/g}$  dry weight. The retention is expressed in bold and as a percentage. Retention was calculated by divided the quantity of a ketocarotenoid in the liver, eye or feces by its content in the feed and multiplying by a hundred. Livers, eyes and feces were pooled per tank (from 10 trout). *N* represents the number of tank analysed. An absence of figure means that the carotenoid was detected in the samples analysed. Keto., ketocarotenoids.

**Table S7. Details of statistical analysis performed in SPSS software**

| Display  | Analysis of           | Dependent variable |                  | comparison  |                  | Statistical analysis | p-value      | stars    |
|----------|-----------------------|--------------------|------------------|-------------|------------------|----------------------|--------------|----------|
| Table S1 | Carotenoids in tomato | Phytoene           | Greenhouse       | compared to | Early polytunnel | One way ANOVA        | Games-Howell | .962     |
| Table S1 | Carotenoids in tomato | Phytoene           | Greenhouse       | compared to | Late polytunnel  | One way ANOVA        | Games-Howell | .000 *** |
| Table S1 | Carotenoids in tomato | Phytoene           | Early polytunnel | compared to | Late polytunnel  | One way ANOVA        | Games-Howell | .000 *** |
| Table S1 | Carotenoids in tomato | Phytofluene        | Greenhouse       | compared to | Early polytunnel | One way ANOVA        | Tukey        | .000 *** |
| Table S1 | Carotenoids in tomato | Phytofluene        | Greenhouse       | compared to | Late polytunnel  | One way ANOVA        | Tukey        | .000 *** |
| Table S1 | Carotenoids in tomato | Phytofluene        | Early polytunnel | compared to | Late polytunnel  | One way ANOVA        | Tukey        | .000 *** |
| Table S1 | Carotenoids in tomato | b-carotene         | Greenhouse       | compared to | Early polytunnel | One way ANOVA        | Games-Howell | .000 *** |
| Table S1 | Carotenoids in tomato | b-carotene         | Greenhouse       | compared to | Late polytunnel  | One way ANOVA        | Games-Howell | .000 *** |
| Table S1 | Carotenoids in tomato | b-carotene         | Early polytunnel | compared to | Late polytunnel  | One way ANOVA        | Games-Howell | .000 *** |
| Table S1 | Carotenoids in tomato | Echinenone         | Greenhouse       | compared to | Early polytunnel | One way ANOVA        | Tukey        | .000 *** |
| Table S1 | Carotenoids in tomato | Echinenone         | Greenhouse       | compared to | Late polytunnel  | One way ANOVA        | Tukey        | .000 *** |
| Table S1 | Carotenoids in tomato | Echinenone         | Early polytunnel | compared to | Late polytunnel  | One way ANOVA        | Tukey        | .000 *** |
| Table S1 | Carotenoids in tomato | 3-OH-Echinenone    | Greenhouse       | compared to | Early polytunnel | One way ANOVA        | Games-Howell | .280     |

|          |                       |                       |                  |             |                  |               |              |      |     |
|----------|-----------------------|-----------------------|------------------|-------------|------------------|---------------|--------------|------|-----|
| Table S1 | Carotenoids in tomato | 3-OH-Echinenone       | Greenhouse       | compared to | Late polytunnel  | One way ANOVA | Games-Howell | .000 | *** |
| Table S1 | Carotenoids in tomato | 3-OH-Echinenone       | Early polytunnel | compared to | Late polytunnel  | One way ANOVA | Games-Howell | .000 | *** |
| Table S1 | Carotenoids in tomato | 3'-OH-Echinenone      | Greenhouse       | compared to | Early polytunnel | One way ANOVA | Games-Howell | .446 |     |
| Table S1 | Carotenoids in tomato | 3'-OH-Echinenone      | Greenhouse       | compared to | Late polytunnel  | One way ANOVA | Games-Howell | .003 | **  |
| Table S1 | Carotenoids in tomato | 3'-OH-Echinenone      | Early polytunnel | compared to | Late polytunnel  | One way ANOVA | Games-Howell | .879 |     |
| Table S1 | Carotenoids in tomato | Canthaxanthin         | Greenhouse       | compared to | Early polytunnel | One way ANOVA | Tukey        | .885 |     |
| Table S1 | Carotenoids in tomato | Canthaxanthin         | Greenhouse       | compared to | Late polytunnel  | One way ANOVA | Tukey        | .000 | *** |
| Table S1 | Carotenoids in tomato | Canthaxanthin         | Early polytunnel | compared to | Late polytunnel  | One way ANOVA | Tukey        | .001 | *** |
| Table S1 | Carotenoids in tomato | Phoenicoxanthin       | Greenhouse       | compared to | Early polytunnel | One way ANOVA | Games-Howell | .042 | *   |
| Table S1 | Carotenoids in tomato | Phoenicoxanthin       | Greenhouse       | compared to | Late polytunnel  | One way ANOVA | Games-Howell | .000 | *** |
| Table S1 | Carotenoids in tomato | Phoenicoxanthin       | Early polytunnel | compared to | Late polytunnel  | One way ANOVA | Games-Howell | .000 | *** |
| Table S1 | Carotenoids in tomato | Astaxanthin           | Greenhouse       | compared to | Early polytunnel | One way ANOVA | Games-Howell | .816 |     |
| Table S1 | Carotenoids in tomato | Astaxanthin           | Greenhouse       | compared to | Late polytunnel  | One way ANOVA | Games-Howell | .000 | *** |
| Table S1 | Carotenoids in tomato | Astaxanthin           | Early polytunnel | compared to | Late polytunnel  | One way ANOVA | Games-Howell | .000 | *** |
| Table S1 | Carotenoids in tomato | Phoenicoxanthin-C14:0 | Greenhouse       | compared to | Early polytunnel | One way ANOVA | Games-Howell | .000 | *** |
| Table S1 | Carotenoids in tomato | Phoenicoxanthin-C14:0 | Greenhouse       | compared to | Late polytunnel  | One way ANOVA | Games-Howell | .000 | *** |

|          |                       |                       |                  |             |                  |               |              |      |     |
|----------|-----------------------|-----------------------|------------------|-------------|------------------|---------------|--------------|------|-----|
| Table S1 | Carotenoids in tomato | Phoenicoxanthin-C14:0 | Early polytunnel | compared to | Late polytunnel  | One way ANOVA | Games-Howell | .000 | *** |
| Table S1 | Carotenoids in tomato | Phoenicoxanthin-C16:0 | Greenhouse       | compared to | Early polytunnel | One way ANOVA | Games-Howell | .000 | *** |
| Table S1 | Carotenoids in tomato | Phoenicoxanthin-C16:0 | Greenhouse       | compared to | Late polytunnel  | One way ANOVA | Games-Howell | .017 | *   |
| Table S1 | Carotenoids in tomato | Phoenicoxanthin-C16:0 | Early polytunnel | compared to | Late polytunnel  | One way ANOVA | Games-Howell | .376 |     |
| Table S1 | Carotenoids in tomato | Adonixanthin-C14:1    | Greenhouse       | compared to | Early polytunnel | One way ANOVA | Games-Howell | .038 | *   |
| Table S1 | Carotenoids in tomato | Adonixanthin-C14:1    | Greenhouse       | compared to | Late polytunnel  | One way ANOVA | Games-Howell | .000 | *** |
| Table S1 | Carotenoids in tomato | Adonixanthin-C14:1    | Early polytunnel | compared to | Late polytunnel  | One way ANOVA | Games-Howell | .009 | **  |
| Table S1 | Carotenoids in tomato | Adonixanthin-C16:1    | Greenhouse       | compared to | Early polytunnel | One way ANOVA | Games-Howell | .542 |     |
| Table S1 | Carotenoids in tomato | Adonixanthin-C16:1    | Greenhouse       | compared to | Late polytunnel  | One way ANOVA | Games-Howell | .070 |     |
| Table S1 | Carotenoids in tomato | Adonixanthin-C16:1    | Early polytunnel | compared to | Late polytunnel  | One way ANOVA | Games-Howell | .533 |     |
| Table S1 | Carotenoids in tomato | Total ketocarotenoids | Greenhouse       | compared to | Early polytunnel | One way ANOVA | Games-Howell | .001 | *** |
| Table S1 | Carotenoids in tomato | Total ketocarotenoids | Greenhouse       | compared to | Late polytunnel  | One way ANOVA | Games-Howell | .000 | *** |
| Table S1 | Carotenoids in tomato | Total ketocarotenoids | Early polytunnel | compared to | Late polytunnel  | One way ANOVA | Games-Howell | .000 | *** |
| Table S1 | Carotenoids in tomato | Total                 | Greenhouse       | compared to | Early polytunnel | One way ANOVA | Games-Howell | .013 | *   |
| Table S1 | Carotenoids in tomato | Total                 | Greenhouse       | compared to | Late polytunnel  | One way ANOVA | Games-Howell | .000 | *** |
| Table S1 | Carotenoids in tomato | Total                 | Early polytunnel | compared to | Late polytunnel  | One way ANOVA | Games-Howell | .000 | *** |

|         |                                 |       |        |             |       |               |       |      |     |
|---------|---------------------------------|-------|--------|-------------|-------|---------------|-------|------|-----|
| Fig. S2 | Fatty acids in tomato (mg/g DW) | C16:0 | ZWØRIØ | compared to | ZWØRI | One way ANOVA | Tukey | .869 |     |
| Fig. S2 | Fatty acids in tomato (mg/g DW) | C16:0 | ZWØRIØ | compared to | ZWRI  | One way ANOVA | Tukey | .540 |     |
| Fig. S2 | Fatty acids in tomato (mg/g DW) | C16:0 | ZWØRI  | compared to | ZWRI  | One way ANOVA | Tukey | .306 |     |
| Fig. S2 | Fatty acids in tomato (mg/g DW) | C16:1 | ZWØRIØ | compared to | ZWØRI | One way ANOVA | Tukey | .437 |     |
| Fig. S2 | Fatty acids in tomato (mg/g DW) | C16:1 | ZWØRIØ | compared to | ZWRI  | One way ANOVA | Tukey | .000 | *** |
| Fig. S2 | Fatty acids in tomato (mg/g DW) | C16:1 | ZWØRI  | compared to | ZWRI  | One way ANOVA | Tukey | .000 | *** |
| Fig. S2 | Fatty acids in tomato (mg/g DW) | C18:0 | ZWØRIØ | compared to | ZWØRI | One way ANOVA | Tukey | .010 | *   |
| Fig. S2 | Fatty acids in tomato (mg/g DW) | C18:0 | ZWØRIØ | compared to | ZWRI  | One way ANOVA | Tukey | .002 | **  |
| Fig. S2 | Fatty acids in tomato (mg/g DW) | C18:0 | ZWØRI  | compared to | ZWRI  | One way ANOVA | Tukey | .330 |     |
| Fig. S2 | Fatty acids in tomato (mg/g DW) | C18:1 | ZWØRIØ | compared to | ZWØRI | One way ANOVA | Tukey | .000 | *** |
| Fig. S2 | Fatty acids in tomato (mg/g DW) | C18:1 | ZWØRIØ | compared to | ZWRI  | One way ANOVA | Tukey | .001 | *** |
| Fig. S2 | Fatty acids in tomato (mg/g DW) | C18:1 | ZWØRI  | compared to | ZWRI  | One way ANOVA | Tukey | .942 |     |
| Fig. S2 | Fatty acids in tomato (mg/g DW) | C18:2 | ZWØRIØ | compared to | ZWØRI | One way ANOVA | Tukey | .609 |     |
| Fig. S2 | Fatty acids in tomato (mg/g DW) | C18:2 | ZWØRIØ | compared to | ZWRI  | One way ANOVA | Tukey | .049 | *   |
| Fig. S2 | Fatty acids in tomato (mg/g DW) | C18:2 | ZWØRI  | compared to | ZWRI  | One way ANOVA | Tukey | .172 |     |
| Fig. S2 | Fatty acids in tomato (mg/g DW) | C18:3 | ZWØRIØ | compared to | ZWØRI | One way ANOVA | Tukey | .337 |     |

|         |                                               |                   |                      |             |                      |               |              |       |    |
|---------|-----------------------------------------------|-------------------|----------------------|-------------|----------------------|---------------|--------------|-------|----|
| Fig. S2 | Fatty acids in tomato (mg/g DW)               | C18:3             | ZWØRIØ               | compared to | ZWRI                 | One way ANOVA | Tukey        | .005  | ** |
| Fig. S2 | Fatty acids in tomato (mg/g DW)               | C18:3             | ZWØRI                | compared to | ZWRI                 | One way ANOVA | Tukey        | .024  | *  |
| Fig. S2 | Fatty acids in tomato (mg/g DW)               | Total fatty acids | ZWØRIØ               | compared to | ZWØRI                | One way ANOVA | Tukey        | .216  |    |
| Fig. S2 | Fatty acids in tomato (mg/g DW)               | Total fatty acids | ZWØRIØ               | compared to | ZWRI                 | One way ANOVA | Tukey        | .248  |    |
| Fig. S2 | Fatty acids in tomato (mg/g DW)               | Total fatty acids | ZWØRI                | compared to | ZWRI                 | One way ANOVA | Tukey        | .993  |    |
| Fig. S5 | Trout final weight (fresh water trial)        | trout weight      | BioMar trout         | compared to | Basic trout          | One way ANOVA | Games-Howell | .958  |    |
| Fig. S5 | Trout final weight (fresh water trial)        | trout weight      | BioMar trout         | compared to | Control tomato trout | One way ANOVA | Games-Howell | .637  |    |
| Fig. S5 | Trout final weight (fresh water trial)        | trout weight      | BioMar trout         | compared to | ZWRI tomato trout    | One way ANOVA | Games-Howell | .371  |    |
| Fig. S5 | Trout final weight (fresh water trial)        | trout weight      | Basic trout          | compared to | Control tomato trout | One way ANOVA | Games-Howell | .948  |    |
| Fig. S5 | Trout final weight (fresh water trial)        | trout weight      | Basic trout          | compared to | ZWRI tomato trout    | One way ANOVA | Games-Howell | .823  |    |
| Fig. S5 | Trout final weight (fresh water trial)        | trout weight      | ZWRI tomato trout    | compared to | Control tomato trout | One way ANOVA | Games-Howell | 1.000 |    |
| Fig. S5 | Trout final weight 60d (brackish water trial) | trout weight      | Carophyll pink trout | compared to | Basic trout          | One way ANOVA | Tukey        | 1.000 |    |
| Fig. S5 | Trout final weight 60d (brackish water trial) | trout weight      | Carophyll pink trout | compared to | Control tomato trout | One way ANOVA | Tukey        | .099  |    |

|         |                                               |              |                      |             |                      |               |       |      |
|---------|-----------------------------------------------|--------------|----------------------|-------------|----------------------|---------------|-------|------|
| Fig. S5 | Trout final weight 60d (brackish water trial) | trout weight | Carophyll pink trout | compared to | ZWRI tomato trout    | One way ANOVA | Tukey | .342 |
| Fig. S5 | Trout final weight 60d (brackish water trial) | trout weight | Carophyll pink trout | compared to | ZWRI extract trout   | One way ANOVA | Tukey | .918 |
| Fig. S5 | Trout final weight 60d (brackish water trial) | trout weight | Basic trout          | compared to | Control tomato trout | One way ANOVA | Tukey | .150 |
| Fig. S5 | Trout final weight 60d (brackish water trial) | trout weight | Basic trout          | compared to | ZWRI tomato trout    | One way ANOVA | Tukey | .451 |
| Fig. S5 | Trout final weight 60d (brackish water trial) | trout weight | Basic trout          | compared to | ZWRI extract trout   | One way ANOVA | Tukey | .966 |
| Fig. S5 | Trout final weight 60d (brackish water trial) | trout weight | ZWRI tomato trout    | compared to | Control tomato trout | One way ANOVA | Tukey | .966 |
| Fig. S5 | Trout final weight 60d (brackish water trial) | trout weight | ZWRI tomato trout    | compared to | ZWRI extract trout   | One way ANOVA | Tukey | .827 |
| Fig. S5 | Trout final weight 60d (brackish water trial) | trout weight | Control tomato trout | compared to | ZWRI extract trout   | One way ANOVA | Tukey | .433 |
| Fig. S5 | Trout final weight 80d (brackish water trial) | trout weight | Carophyll pink trout | compared to | Basic trout          | One way ANOVA | Tukey | .994 |
| Fig. S5 | Trout final weight 80d (brackish water trial) | trout weight | Carophyll pink trout | compared to | Control tomato trout | One way ANOVA | Tukey | .224 |
| Fig. S5 | Trout final weight 80d (brackish water trial) | trout weight | Carophyll pink trout | compared to | ZWRI tomato trout    | One way ANOVA | Tukey | .995 |



|         |                                               |              |                      |             |                       |               |       |       |
|---------|-----------------------------------------------|--------------|----------------------|-------------|-----------------------|---------------|-------|-------|
| Fig. S5 | Trout final weight 80d (brackish water trial) | trout weight | Carophyll pink trout | compared to | ZWRI extract trout    | One way ANOVA | Tukey | .999  |
| Fig. S5 | Trout final weight 80d (brackish water trial) | trout weight | Basic trout          | compared to | Control tomato trout  | One way ANOVA | Tukey | .111  |
| Fig. S5 | Trout final weight 80d (brackish water trial) | trout weight | Basic trout          | compared to | ZWRI tomato trout     | One way ANOVA | Tukey | .937  |
| Fig. S5 | Trout final weight 80d (brackish water trial) | trout weight | Basic trout          | compared to | ZWRI extract trout    | One way ANOVA | Tukey | 1.000 |
| Fig. S5 | Trout final weight 80d (brackish water trial) | trout weight | ZWRI tomato trout    | compared to | Control tomato trout  | One way ANOVA | Tukey | .469  |
| Fig. S5 | Trout final weight 80d (brackish water trial) | trout weight | ZWRI tomato trout    | compared to | ZWRI extract trout    | One way ANOVA | Tukey | .966  |
| Fig. S5 | Trout final weight 80d (brackish water trial) | trout weight | Control tomato trout | compared to | ZWRI extract trout    | One way ANOVA | Tukey | .142  |
| Fig. S6 | Cholesterol in trout fillet                   | Cholesterol  | BioMar fillet        | compared to | Basic fillet          | One way ANOVA | Tukey | .521  |
| Fig. S6 | Cholesterol in trout fillet                   | Cholesterol  | BioMar fillet        | compared to | ZWRI tomato fillet    | One way ANOVA | Tukey | .977  |
| Fig. S6 | Cholesterol in trout fillet                   | Cholesterol  | BioMar fillet        | compared to | Control tomato fillet | One way ANOVA | Tukey | .780  |
| Fig. S6 | Cholesterol in trout fillet                   | Cholesterol  | Basic fillet         | compared to | ZWRI tomato fillet    | One way ANOVA | Tukey | .276  |

|         |                             |                 |                    |             |                       |               |              |      |     |
|---------|-----------------------------|-----------------|--------------------|-------------|-----------------------|---------------|--------------|------|-----|
| Fig. S6 | Cholesterol in trout fillet | Cholesterol     | Basic fillet       | compared to | Control tomato fillet | One way ANOVA | Tukey        | .079 |     |
| Fig. S6 | Cholesterol in trout fillet | Cholesterol     | ZWRI tomato fillet | compared to | Control tomato fillet | One way ANOVA | Tukey        | .953 |     |
| Fig. S6 | Cholesterol in trout liver  | Cholesterol     | BioMar liver       | compared to | Basic liver           | One way ANOVA | Games-Howell | .469 |     |
| Fig. S6 | Cholesterol in trout liver  | Cholesterol     | BioMar liver       | compared to | ZWRI tomato liver     | One way ANOVA | Games-Howell | .803 |     |
| Fig. S6 | Cholesterol in trout liver  | Cholesterol     | BioMar liver       | compared to | Control tomato liver  | One way ANOVA | Games-Howell | .614 |     |
| Fig. S6 | Cholesterol in trout liver  | Cholesterol     | Basic liver        | compared to | ZWRI tomato liver     | One way ANOVA | Games-Howell | .834 |     |
| Fig. S6 | Cholesterol in trout liver  | Cholesterol     | Basic liver        | compared to | Control tomato liver  | One way ANOVA | Games-Howell | .903 |     |
| Fig. S6 | Cholesterol in trout liver  | Cholesterol     | ZWRI tomato liver  | compared to | Control tomato liver  | One way ANOVA | Games-Howell | .982 |     |
| Fig. S7 | Retinoids in trout liver    | Retinyl acetate | BioMar liver       | compared to | Basic liver           | One way ANOVA | Games-Howell | .001 | *** |
| Fig. S7 | Retinoids in trout liver    | Retinyl acetate | BioMar liver       | compared to | ZWRI tomato liver     | One way ANOVA | Games-Howell | .401 |     |
| Fig. S7 | Retinoids in trout liver    | Retinyl acetate | BioMar liver       | compared to | Control tomato liver  | One way ANOVA | Games-Howell | .002 | **  |

|         |                                                 |                    |                   |             |                      |                    |                         |      |     |
|---------|-------------------------------------------------|--------------------|-------------------|-------------|----------------------|--------------------|-------------------------|------|-----|
| Fig. S7 | Retinoids in trout liver                        | Retinyl acetate    | Basic liver       | compared to | ZWRI tomato liver    | One way ANOVA      | Games-Howell            | .038 | *   |
| Fig. S7 | Retinoids in trout liver                        | Retinyl acetate    | Basic liver       | compared to | Control tomato liver | One way ANOVA      | Games-Howell            | .254 |     |
| Fig. S7 | Retinoids in trout liver                        | Retinyl acetate    | ZWRI tomato liver | compared to | Control tomato liver | One way ANOVA      | Games-Howell            | .142 |     |
| Fig. S7 | Retinoids in trout liver                        | b-apo-14-carotenal | BioMar liver      | compared to | Basic liver          | One way ANOVA      | Games-Howell            | .001 | *** |
| Fig. S7 | Retinoids in trout liver                        | b-apo-14-carotenal | BioMar liver      | compared to | ZWRI tomato liver    | One way ANOVA      | Games-Howell            | .897 |     |
| Fig. S7 | Retinoids in trout liver                        | b-apo-14-carotenal | BioMar liver      | compared to | Control tomato liver | One way ANOVA      | Games-Howell            | .005 | **  |
| Fig. S7 | Retinoids in trout liver                        | b-apo-14-carotenal | Basic liver       | compared to | ZWRI tomato liver    | One way ANOVA      | Games-Howell            | .026 | *   |
| Fig. S7 | Retinoids in trout liver                        | b-apo-14-carotenal | Basic liver       | compared to | Control tomato liver | One way ANOVA      | Games-Howell            | .056 |     |
| Fig. S7 | Retinoids in trout liver                        | b-apo-14-carotenal | ZWRI tomato liver | compared to | Control tomato liver | One way ANOVA      | Games-Howell            | .067 |     |
| Fig. S8 | Fatty acids in feed and trout fillets (mg/g DW) | C14:0              | BioMar fillet     | compared to | BioMar feed          | Independent t-test | Equal variances assumed | .103 |     |
| Fig. S8 | Fatty acids in feed and trout fillets (mg/g DW) | C16:0              | BioMar fillet     | compared to | BioMar feed          | Independent t-test | Equal variances assumed | .000 | *** |

|         |                                                 |                   |               |             |             |                    |                             |      |     |
|---------|-------------------------------------------------|-------------------|---------------|-------------|-------------|--------------------|-----------------------------|------|-----|
| Fig. S8 | Fatty acids in feed and trout fillets (mg/g DW) | C16:1             | BioMar fillet | compared to | BioMar feed | Independent t-test | Equal variances assumed     | .000 | *** |
| Fig. S8 | Fatty acids in feed and trout fillets (mg/g DW) | C18:0             | BioMar fillet | compared to | BioMar feed | Independent t-test | Equal variances not assumed | .000 | *** |
| Fig. S8 | Fatty acids in feed and trout fillets (mg/g DW) | C18:1             | BioMar fillet | compared to | BioMar feed | Independent t-test | Equal variances not assumed | .031 | *   |
| Fig. S8 | Fatty acids in feed and trout fillets (mg/g DW) | C18:2             | BioMar fillet | compared to | BioMar feed | Independent t-test | Equal variances assumed     | .001 | **  |
| Fig. S8 | Fatty acids in feed and trout fillets (mg/g DW) | C18:3             | BioMar fillet | compared to | BioMar feed | Independent t-test | Equal variances not assumed | .420 |     |
| Fig. S8 | Fatty acids in feed and trout fillets (mg/g DW) | C20:1             | BioMar fillet | compared to | BioMar feed | Independent t-test | Equal variances not assumed | .608 |     |
| Fig. S8 | Fatty acids in feed and trout fillets (mg/g DW) | C20:5             | BioMar fillet | compared to | BioMar feed | Independent t-test | Equal variances assumed     | .644 |     |
| Fig. S8 | Fatty acids in feed and trout fillets (mg/g DW) | C22:6             | BioMar fillet | compared to | BioMar feed | Independent t-test | Equal variances not assumed | .000 | *** |
| Fig. S8 | Fatty acids in feed and trout fillets (mg/g DW) | Total fatty acids | BioMar fillet | compared to | BioMar feed | Independent t-test | Equal variances assumed     | .145 |     |
| Fig. S8 | Fatty acids in feed and trout fillets (mg/g DW) | C14:0             | Basic fillet  | compared to | Basic feed  | Independent t-test | Equal variances not assumed | .958 |     |

|         |                                                 |                   |              |             |            |                    |                             |      |     |
|---------|-------------------------------------------------|-------------------|--------------|-------------|------------|--------------------|-----------------------------|------|-----|
| Fig. S8 | Fatty acids in feed and trout fillets (mg/g DW) | C16:0             | Basic fillet | compared to | Basic feed | Independent t-test | Equal variances assumed     | .000 | *** |
| Fig. S8 | Fatty acids in feed and trout fillets (mg/g DW) | C16:1             | Basic fillet | compared to | Basic feed | Independent t-test | Equal variances not assumed | .000 | *** |
| Fig. S8 | Fatty acids in feed and trout fillets (mg/g DW) | C18:0             | Basic fillet | compared to | Basic feed | Independent t-test | Equal variances assumed     | .000 | *** |
| Fig. S8 | Fatty acids in feed and trout fillets (mg/g DW) | C18:1             | Basic fillet | compared to | Basic feed | Independent t-test | Equal variances not assumed | .143 |     |
| Fig. S8 | Fatty acids in feed and trout fillets (mg/g DW) | C18:2             | Basic fillet | compared to | Basic feed | Independent t-test | Equal variances not assumed | .002 | **  |
| Fig. S8 | Fatty acids in feed and trout fillets (mg/g DW) | C18:3             | Basic fillet | compared to | Basic feed | Independent t-test | Equal variances not assumed | .672 |     |
| Fig. S8 | Fatty acids in feed and trout fillets (mg/g DW) | C20:1             | Basic fillet | compared to | Basic feed | Independent t-test | Equal variances assumed     | .853 |     |
| Fig. S8 | Fatty acids in feed and trout fillets (mg/g DW) | C20:5             | Basic fillet | compared to | Basic feed | Independent t-test | Equal variances assumed     | .270 |     |
| Fig. S8 | Fatty acids in feed and trout fillets (mg/g DW) | C22:6             | Basic fillet | compared to | Basic feed | Independent t-test | Equal variances not assumed | .000 | *** |
| Fig. S8 | Fatty acids in feed and trout fillets (mg/g DW) | Total fatty acids | Basic fillet | compared to | Basic feed | Independent t-test | Equal variances not assumed | .994 |     |

|         |                                                 |       |                       |             |                     |                    |                             |      |     |
|---------|-------------------------------------------------|-------|-----------------------|-------------|---------------------|--------------------|-----------------------------|------|-----|
| Fig. S8 | Fatty acids in feed and trout fillets (mg/g DW) | C14:0 | Control tomato fillet | compared to | Control tomato feed | Independent t-test | Equal variances assumed     | .004 | **  |
| Fig. S8 | Fatty acids in feed and trout fillets (mg/g DW) | C16:0 | Control tomato fillet | compared to | Control tomato feed | Independent t-test | Equal variances assumed     | .000 | *** |
| Fig. S8 | Fatty acids in feed and trout fillets (mg/g DW) | C16:1 | Control tomato fillet | compared to | Control tomato feed | Independent t-test | Equal variances not assumed | .000 | *** |
| Fig. S8 | Fatty acids in feed and trout fillets (mg/g DW) | C18:0 | Control tomato fillet | compared to | Control tomato feed | Independent t-test | Equal variances not assumed | .000 | *** |
| Fig. S8 | Fatty acids in feed and trout fillets (mg/g DW) | C18:1 | Control tomato fillet | compared to | Control tomato feed | Independent t-test | Equal variances assumed     | .000 | *** |
| Fig. S8 | Fatty acids in feed and trout fillets (mg/g DW) | C18:2 | Control tomato fillet | compared to | Control tomato feed | Independent t-test | Equal variances assumed     | .517 |     |
| Fig. S8 | Fatty acids in feed and trout fillets (mg/g DW) | C18:3 | Control tomato fillet | compared to | Control tomato feed | Independent t-test | Equal variances assumed     | .000 | *** |
| Fig. S8 | Fatty acids in feed and trout fillets (mg/g DW) | C20:1 | Control tomato fillet | compared to | Control tomato feed | Independent t-test | Equal variances assumed     | .009 | **  |
| Fig. S8 | Fatty acids in feed and trout fillets (mg/g DW) | C20:5 | Control tomato fillet | compared to | Control tomato feed | Independent t-test | Equal variances assumed     | .289 |     |
| Fig. S8 | Fatty acids in feed and trout fillets (mg/g DW) | C22:6 | Control tomato fillet | compared to | Control tomato feed | Independent t-test | Equal variances assumed     | .000 | *** |

|         |                                                 |                   |                       |             |                     |                    |                             |      |     |
|---------|-------------------------------------------------|-------------------|-----------------------|-------------|---------------------|--------------------|-----------------------------|------|-----|
| Fig. S8 | Fatty acids in feed and trout fillets (mg/g DW) | Total fatty acids | Control tomato fillet | compared to | Control tomato feed | Independent t-test | Equal variances assumed     | .001 | *** |
| Fig. S8 | Fatty acids in feed and trout fillets (mg/g DW) | C14:0             | ZWRI tomato fillet    | compared to | ZWRI tomato feed    | Independent t-test | Equal variances assumed     | .333 |     |
| Fig. S8 | Fatty acids in feed and trout fillets (mg/g DW) | C16:0             | ZWRI tomato fillet    | compared to | ZWRI tomato feed    | Independent t-test | Equal variances assumed     | .005 | **  |
| Fig. S8 | Fatty acids in feed and trout fillets (mg/g DW) | C16:1             | ZWRI tomato fillet    | compared to | ZWRI tomato feed    | Independent t-test | Equal variances assumed     | .000 | *** |
| Fig. S8 | Fatty acids in feed and trout fillets (mg/g DW) | C18:0             | ZWRI tomato fillet    | compared to | ZWRI tomato feed    | Independent t-test | Equal variances assumed     | .000 | *** |
| Fig. S8 | Fatty acids in feed and trout fillets (mg/g DW) | C18:1             | ZWRI tomato fillet    | compared to | ZWRI tomato feed    | Independent t-test | Equal variances assumed     | .051 |     |
| Fig. S8 | Fatty acids in feed and trout fillets (mg/g DW) | C18:2             | ZWRI tomato fillet    | compared to | ZWRI tomato feed    | Independent t-test | Equal variances assumed     | .000 | *** |
| Fig. S8 | Fatty acids in feed and trout fillets (mg/g DW) | C18:3             | ZWRI tomato fillet    | compared to | ZWRI tomato feed    | Independent t-test | Equal variances not assumed | .000 | *** |
| Fig. S8 | Fatty acids in feed and trout fillets (mg/g DW) | C20:1             | ZWRI tomato fillet    | compared to | ZWRI tomato feed    | Independent t-test | Equal variances assumed     | .249 |     |
| Fig. S8 | Fatty acids in feed and trout fillets (mg/g DW) | C20:5             | ZWRI tomato fillet    | compared to | ZWRI tomato feed    | Independent t-test | Equal variances not assumed | .249 |     |

|         |                                                 |                   |                    |             |                  |                    |                             |      |     |
|---------|-------------------------------------------------|-------------------|--------------------|-------------|------------------|--------------------|-----------------------------|------|-----|
| Fig. S8 | Fatty acids in feed and trout fillets (mg/g DW) | C22:6             | ZWRI tomato fillet | compared to | ZWRI tomato feed | Independent t-test | Equal variances not assumed | .000 | *** |
| Fig. S8 | Fatty acids in feed and trout fillets (mg/g DW) | Total fatty acids | ZWRI tomato fillet | compared to | ZWRI tomato feed | Independent t-test | Equal variances assumed     | .552 |     |
| Fig. S8 | Fatty acids in feed and trout fillets (%)       | C14:0             | BioMar fillet      | compared to | BioMar feed      | Independent t-test | Equal variances assumed     | .002 | **  |
| Fig. S8 | Fatty acids in feed and trout fillets (%)       | C16:0             | BioMar fillet      | compared to | BioMar feed      | Independent t-test | Equal variances not assumed | .000 | *** |
| Fig. S8 | Fatty acids in feed and trout fillets (%)       | C16:1             | BioMar fillet      | compared to | BioMar feed      | Independent t-test | Equal variances not assumed | .001 | *** |
| Fig. S8 | Fatty acids in feed and trout fillets (%)       | C18:0             | BioMar fillet      | compared to | BioMar feed      | Independent t-test | Equal variances not assumed | .000 | *** |
| Fig. S8 | Fatty acids in feed and trout fillets (%)       | C18:1             | BioMar fillet      | compared to | BioMar feed      | Independent t-test | Equal variances not assumed | .000 | *** |
| Fig. S8 | Fatty acids in feed and trout fillets (%)       | C18:2             | BioMar fillet      | compared to | BioMar feed      | Independent t-test | Equal variances assumed     | .000 | *** |
| Fig. S8 | Fatty acids in feed and trout fillets (%)       | C18:3             | BioMar fillet      | compared to | BioMar feed      | Independent t-test | Equal variances assumed     | .000 | *** |
| Fig. S8 | Fatty acids in feed and trout fillets (%)       | C20:1             | BioMar fillet      | compared to | BioMar feed      | Independent t-test | Equal variances assumed     | .005 | **  |



|         |                                           |       |               |             |             |                    |                             |      |     |
|---------|-------------------------------------------|-------|---------------|-------------|-------------|--------------------|-----------------------------|------|-----|
| Fig. S8 | Fatty acids in feed and trout fillets (%) | C20:5 | BioMar fillet | compared to | BioMar feed | Independent t-test | Equal variances assumed     | .119 |     |
| Fig. S8 | Fatty acids in feed and trout fillets (%) | C22:6 | BioMar fillet | compared to | BioMar feed | Independent t-test | Equal variances assumed     | .000 | *** |
| Fig. S8 | Fatty acids in feed and trout fillets (%) | C14:0 | Basic fillet  | compared to | Basic feed  | Independent t-test | Equal variances assumed     | .008 | **  |
| Fig. S8 | Fatty acids in feed and trout fillets (%) | C16:0 | Basic fillet  | compared to | Basic feed  | Independent t-test | Equal variances assumed     | .000 | *** |
| Fig. S8 | Fatty acids in feed and trout fillets (%) | C16:1 | Basic fillet  | compared to | Basic feed  | Independent t-test | Equal variances not assumed | .000 | *** |
| Fig. S8 | Fatty acids in feed and trout fillets (%) | C18:0 | Basic fillet  | compared to | Basic feed  | Independent t-test | Equal variances not assumed | .000 | *** |
| Fig. S8 | Fatty acids in feed and trout fillets (%) | C18:1 | Basic fillet  | compared to | Basic feed  | Independent t-test | Equal variances assumed     | .000 | *** |
| Fig. S8 | Fatty acids in feed and trout fillets (%) | C18:2 | Basic fillet  | compared to | Basic feed  | Independent t-test | Equal variances assumed     | .000 | *** |
| Fig. S8 | Fatty acids in feed and trout fillets (%) | C18:3 | Basic fillet  | compared to | Basic feed  | Independent t-test | Equal variances assumed     | .000 | *** |
| Fig. S8 | Fatty acids in feed and trout fillets (%) | C20:1 | Basic fillet  | compared to | Basic feed  | Independent t-test | Equal variances assumed     | .069 |     |

|         |                                           |       |                       |             |                     |                    |                         |      |     |
|---------|-------------------------------------------|-------|-----------------------|-------------|---------------------|--------------------|-------------------------|------|-----|
| Fig. S8 | Fatty acids in feed and trout fillets (%) | C20:5 | Basic fillet          | compared to | Basic feed          | Independent t-test | Equal variances assumed | .584 |     |
| Fig. S8 | Fatty acids in feed and trout fillets (%) | C22:6 | Basic fillet          | compared to | Basic feed          | Independent t-test | Equal variances assumed | .000 | *** |
| Fig. S8 | Fatty acids in feed and trout fillets (%) | C14:0 | Control tomato fillet | compared to | Control tomato feed | Independent t-test | Equal variances assumed | .276 |     |
| Fig. S8 | Fatty acids in feed and trout fillets (%) | C16:0 | Control tomato fillet | compared to | Control tomato feed | Independent t-test | Equal variances assumed | .000 | *** |
| Fig. S8 | Fatty acids in feed and trout fillets (%) | C16:1 | Control tomato fillet | compared to | Control tomato feed | Independent t-test | Equal variances assumed | .000 | *** |
| Fig. S8 | Fatty acids in feed and trout fillets (%) | C18:0 | Control tomato fillet | compared to | Control tomato feed | Independent t-test | Equal variances assumed | .000 | *** |
| Fig. S8 | Fatty acids in feed and trout fillets (%) | C18:1 | Control tomato fillet | compared to | Control tomato feed | Independent t-test | Equal variances assumed | .000 | *** |
| Fig. S8 | Fatty acids in feed and trout fillets (%) | C18:2 | Control tomato fillet | compared to | Control tomato feed | Independent t-test | Equal variances assumed | .000 | *** |
| Fig. S8 | Fatty acids in feed and trout fillets (%) | C18:3 | Control tomato fillet | compared to | Control tomato feed | Independent t-test | Equal variances assumed | .015 | *   |
| Fig. S8 | Fatty acids in feed and trout fillets (%) | C20:1 | Control tomato fillet | compared to | Control tomato feed | Independent t-test | Equal variances assumed | .280 |     |

|         |                                           |       |                       |             |                     |                    |                             |      |     |
|---------|-------------------------------------------|-------|-----------------------|-------------|---------------------|--------------------|-----------------------------|------|-----|
| Fig. S8 | Fatty acids in feed and trout fillets (%) | C20:5 | Control tomato fillet | compared to | Control tomato feed | Independent t-test | Equal variances not assumed | .150 |     |
| Fig. S8 | Fatty acids in feed and trout fillets (%) | C22:6 | Control tomato fillet | compared to | Control tomato feed | Independent t-test | Equal variances assumed     | .000 | *** |
| Fig. S8 | Fatty acids in feed and trout fillets (%) | C14:0 | ZWRI tomato fillet    | compared to | ZWRI tomato feed    | Independent t-test | Equal variances not assumed | .412 |     |
| Fig. S8 | Fatty acids in feed and trout fillets (%) | C16:0 | ZWRI tomato fillet    | compared to | ZWRI tomato feed    | Independent t-test | Equal variances assumed     | .000 | *** |
| Fig. S8 | Fatty acids in feed and trout fillets (%) | C16:1 | ZWRI tomato fillet    | compared to | ZWRI tomato feed    | Independent t-test | Equal variances not assumed | .000 | *** |
| Fig. S8 | Fatty acids in feed and trout fillets (%) | C18:0 | ZWRI tomato fillet    | compared to | ZWRI tomato feed    | Independent t-test | Equal variances assumed     | .000 | *** |
| Fig. S8 | Fatty acids in feed and trout fillets (%) | C18:1 | ZWRI tomato fillet    | compared to | ZWRI tomato feed    | Independent t-test | Equal variances assumed     | .000 | *** |
| Fig. S8 | Fatty acids in feed and trout fillets (%) | C18:2 | ZWRI tomato fillet    | compared to | ZWRI tomato feed    | Independent t-test | Equal variances assumed     | .000 | *** |
| Fig. S8 | Fatty acids in feed and trout fillets (%) | C18:3 | ZWRI tomato fillet    | compared to | ZWRI tomato feed    | Independent t-test | Equal variances not assumed | .000 | *** |
| Fig. S8 | Fatty acids in feed and trout fillets (%) | C20:1 | ZWRI tomato fillet    | compared to | ZWRI tomato feed    | Independent t-test | Equal variances assumed     | .371 |     |

|         |                                           |       |                    |             |                       |                    |                             |      |     |
|---------|-------------------------------------------|-------|--------------------|-------------|-----------------------|--------------------|-----------------------------|------|-----|
| Fig. S8 | Fatty acids in feed and trout fillets (%) | C20:5 | ZWRI tomato fillet | compared to | ZWRI tomato feed      | Independent t-test | Equal variances not assumed | .000 | *** |
| Fig. S8 | Fatty acids in feed and trout fillets (%) | C22:6 | ZWRI tomato fillet | compared to | ZWRI tomato feed      | Independent t-test | Equal variances assumed     | .000 | *** |
| Fig. S8 | Fatty acids in trout fillets (%)          | C14:0 | BioMar fillet      | compared to | Basic fillet          | One way ANOVA      | Games-Howell                | .000 | *** |
| Fig. S8 | Fatty acids in trout fillets (%)          | C14:0 | BioMar fillet      | compared to | Control tomato fillet | One way ANOVA      | Games-Howell                | .000 | *** |
| Fig. S8 | Fatty acids in trout fillets (%)          | C14:0 | BioMar fillet      | compared to | ZWRI tomato fillet    | One way ANOVA      | Games-Howell                | .000 | *** |
| Fig. S8 | Fatty acids in trout fillets (%)          | C14:0 | Basic fillet       | compared to | Control tomato fillet | One way ANOVA      | Games-Howell                | .988 |     |
| Fig. S8 | Fatty acids in trout fillets (%)          | C14:0 | Basic fillet       | compared to | ZWRI tomato fillet    | One way ANOVA      | Games-Howell                | .904 |     |
| Fig. S8 | Fatty acids in trout fillets (%)          | C14:0 | ZWRI tomato fillet | compared to | Control tomato fillet | One way ANOVA      | Games-Howell                | .991 |     |
| Fig. S8 | Fatty acids in trout fillets (%)          | C16:0 | BioMar fillet      | compared to | Basic fillet          | One way ANOVA      | Games-Howell                | .000 | *** |
| Fig. S8 | Fatty acids in trout fillets (%)          | C16:0 | BioMar fillet      | compared to | Control tomato fillet | One way ANOVA      | Games-Howell                | .000 | *** |
| Fig. S8 | Fatty acids in trout fillets (%)          | C16:0 | BioMar fillet      | compared to | ZWRI tomato fillet    | One way ANOVA      | Games-Howell                | .000 | *** |

|         |                                  |       |                    |             |                       |               |              |      |     |
|---------|----------------------------------|-------|--------------------|-------------|-----------------------|---------------|--------------|------|-----|
| Fig. S8 | Fatty acids in trout fillets (%) | C16:0 | Basic fillet       | compared to | Control tomato fillet | One way ANOVA | Games-Howell | .344 |     |
| Fig. S8 | Fatty acids in trout fillets (%) | C16:0 | Basic fillet       | compared to | ZWRI tomato fillet    | One way ANOVA | Games-Howell | .012 | *   |
| Fig. S8 | Fatty acids in trout fillets (%) | C16:0 | ZWRI tomato fillet | compared to | Control tomato fillet | One way ANOVA | Games-Howell | .144 |     |
| Fig. S8 | Fatty acids in trout fillets (%) | C16:1 | BioMar fillet      | compared to | Basic fillet          | One way ANOVA | Games-Howell | .485 |     |
| Fig. S8 | Fatty acids in trout fillets (%) | C16:1 | BioMar fillet      | compared to | Control tomato fillet | One way ANOVA | Games-Howell | .001 | *** |
| Fig. S8 | Fatty acids in trout fillets (%) | C16:1 | BioMar fillet      | compared to | ZWRI tomato fillet    | One way ANOVA | Games-Howell | .642 |     |
| Fig. S8 | Fatty acids in trout fillets (%) | C16:1 | Basic fillet       | compared to | Control tomato fillet | One way ANOVA | Games-Howell | .204 |     |
| Fig. S8 | Fatty acids in trout fillets (%) | C16:1 | Basic fillet       | compared to | ZWRI tomato fillet    | One way ANOVA | Games-Howell | .992 |     |
| Fig. S8 | Fatty acids in trout fillets (%) | C16:1 | ZWRI tomato fillet | compared to | Control tomato fillet | One way ANOVA | Games-Howell | .083 |     |
| Fig. S8 | Fatty acids in trout fillets (%) | C18:0 | BioMar fillet      | compared to | Basic fillet          | One way ANOVA | Tukey        | .000 | *** |
| Fig. S8 | Fatty acids in trout fillets (%) | C18:0 | BioMar fillet      | compared to | Control tomato fillet | One way ANOVA | Tukey        | .000 | *** |

|         |                                  |       |                    |             |                       |               |              |       |     |
|---------|----------------------------------|-------|--------------------|-------------|-----------------------|---------------|--------------|-------|-----|
| Fig. S8 | Fatty acids in trout fillets (%) | C18:0 | BioMar fillet      | compared to | ZWRI tomato fillet    | One way ANOVA | Tukey        | .000  | *** |
| Fig. S8 | Fatty acids in trout fillets (%) | C18:0 | Basic fillet       | compared to | Control tomato fillet | One way ANOVA | Tukey        | .227  |     |
| Fig. S8 | Fatty acids in trout fillets (%) | C18:0 | Basic fillet       | compared to | ZWRI tomato fillet    | One way ANOVA | Tukey        | 1.000 |     |
| Fig. S8 | Fatty acids in trout fillets (%) | C18:0 | ZWRI tomato fillet | compared to | Control tomato fillet | One way ANOVA | Tukey        | .242  |     |
| Fig. S8 | Fatty acids in trout fillets (%) | C18:1 | BioMar fillet      | compared to | Basic fillet          | One way ANOVA | Games-Howell | .000  | *** |
| Fig. S8 | Fatty acids in trout fillets (%) | C18:1 | BioMar fillet      | compared to | Control tomato fillet | One way ANOVA | Games-Howell | .000  | *** |
| Fig. S8 | Fatty acids in trout fillets (%) | C18:1 | BioMar fillet      | compared to | ZWRI tomato fillet    | One way ANOVA | Games-Howell | .000  | *** |
| Fig. S8 | Fatty acids in trout fillets (%) | C18:1 | Basic fillet       | compared to | Control tomato fillet | One way ANOVA | Games-Howell | .949  |     |
| Fig. S8 | Fatty acids in trout fillets (%) | C18:1 | Basic fillet       | compared to | ZWRI tomato fillet    | One way ANOVA | Games-Howell | .001  | *** |
| Fig. S8 | Fatty acids in trout fillets (%) | C18:1 | ZWRI tomato fillet | compared to | Control tomato fillet | One way ANOVA | Games-Howell | .000  | *** |
| Fig. S8 | Fatty acids in trout fillets (%) | C18:2 | BioMar fillet      | compared to | Basic fillet          | One way ANOVA | Games-Howell | .000  | *** |

|         |                                  |       |                    |             |                       |               |              |      |     |
|---------|----------------------------------|-------|--------------------|-------------|-----------------------|---------------|--------------|------|-----|
| Fig. S8 | Fatty acids in trout fillets (%) | C18:2 | BioMar fillet      | compared to | Control tomato fillet | One way ANOVA | Games-Howell | .000 | *** |
| Fig. S8 | Fatty acids in trout fillets (%) | C18:2 | BioMar fillet      | compared to | ZWRI tomato fillet    | One way ANOVA | Games-Howell | .000 | *** |
| Fig. S8 | Fatty acids in trout fillets (%) | C18:2 | Basic fillet       | compared to | Control tomato fillet | One way ANOVA | Games-Howell | .162 |     |
| Fig. S8 | Fatty acids in trout fillets (%) | C18:2 | Basic fillet       | compared to | ZWRI tomato fillet    | One way ANOVA | Games-Howell | .359 |     |
| Fig. S8 | Fatty acids in trout fillets (%) | C18:2 | ZWRI tomato fillet | compared to | Control tomato fillet | One way ANOVA | Games-Howell | .002 | **  |
| Fig. S8 | Fatty acids in trout fillets (%) | C18:3 | BioMar fillet      | compared to | Basic fillet          | One way ANOVA | Games-Howell | .000 | *** |
| Fig. S8 | Fatty acids in trout fillets (%) | C18:3 | BioMar fillet      | compared to | Control tomato fillet | One way ANOVA | Games-Howell | .000 | *** |
| Fig. S8 | Fatty acids in trout fillets (%) | C18:3 | BioMar fillet      | compared to | ZWRI tomato fillet    | One way ANOVA | Games-Howell | .000 | *** |
| Fig. S8 | Fatty acids in trout fillets (%) | C18:3 | Basic fillet       | compared to | Control tomato fillet | One way ANOVA | Games-Howell | .405 |     |
| Fig. S8 | Fatty acids in trout fillets (%) | C18:3 | Basic fillet       | compared to | ZWRI tomato fillet    | One way ANOVA | Games-Howell | .000 | *** |
| Fig. S8 | Fatty acids in trout fillets (%) | C18:3 | ZWRI tomato fillet | compared to | Control tomato fillet | One way ANOVA | Games-Howell | .116 |     |

|         |                                  |       |                    |             |                       |               |              |      |     |
|---------|----------------------------------|-------|--------------------|-------------|-----------------------|---------------|--------------|------|-----|
| Fig. S8 | Fatty acids in trout fillets (%) | C20:1 | BioMar fillet      | compared to | Basic fillet          | One way ANOVA | Tukey        | .000 | *** |
| Fig. S8 | Fatty acids in trout fillets (%) | C20:1 | BioMar fillet      | compared to | Control tomato fillet | One way ANOVA | Tukey        | .000 | *** |
| Fig. S8 | Fatty acids in trout fillets (%) | C20:1 | BioMar fillet      | compared to | ZWRI tomato fillet    | One way ANOVA | Tukey        | .000 | *** |
| Fig. S8 | Fatty acids in trout fillets (%) | C20:1 | Basic fillet       | compared to | Control tomato fillet | One way ANOVA | Tukey        | .180 |     |
| Fig. S8 | Fatty acids in trout fillets (%) | C20:1 | Basic fillet       | compared to | ZWRI tomato fillet    | One way ANOVA | Tukey        | .098 |     |
| Fig. S8 | Fatty acids in trout fillets (%) | C20:1 | ZWRI tomato fillet | compared to | Control tomato fillet | One way ANOVA | Tukey        | .993 |     |
| Fig. S8 | Fatty acids in trout fillets (%) | C20:5 | BioMar fillet      | compared to | Basic fillet          | One way ANOVA | Games-Howell | .000 | *** |
| Fig. S8 | Fatty acids in trout fillets (%) | C20:5 | BioMar fillet      | compared to | Control tomato fillet | One way ANOVA | Games-Howell | .000 | *** |
| Fig. S8 | Fatty acids in trout fillets (%) | C20:5 | BioMar fillet      | compared to | ZWRI tomato fillet    | One way ANOVA | Games-Howell | .000 | *** |
| Fig. S8 | Fatty acids in trout fillets (%) | C20:5 | Basic fillet       | compared to | Control tomato fillet | One way ANOVA | Games-Howell | .983 |     |
| Fig. S8 | Fatty acids in trout fillets (%) | C20:5 | Basic fillet       | compared to | ZWRI tomato fillet    | One way ANOVA | Games-Howell | .997 |     |



|         |                                  |       |                    |             |                       |               |              |      |     |
|---------|----------------------------------|-------|--------------------|-------------|-----------------------|---------------|--------------|------|-----|
| Fig. S8 | Fatty acids in trout fillets (%) | C20:5 | ZWRI tomato fillet | compared to | Control tomato fillet | One way ANOVA | Games-Howell | .963 |     |
| Fig. S8 | Fatty acids in trout fillets (%) | C22:6 | BioMar fillet      | compared to | Basic fillet          | One way ANOVA | Games-Howell | .000 | *** |
| Fig. S8 | Fatty acids in trout fillets (%) | C22:6 | BioMar fillet      | compared to | Control tomato fillet | One way ANOVA | Games-Howell | .000 | *** |
| Fig. S8 | Fatty acids in trout fillets (%) | C22:6 | BioMar fillet      | compared to | ZWRI tomato fillet    | One way ANOVA | Games-Howell | .000 | *** |
| Fig. S8 | Fatty acids in trout fillets (%) | C22:6 | Basic fillet       | compared to | Control tomato fillet | One way ANOVA | Games-Howell | .957 |     |
| Fig. S8 | Fatty acids in trout fillets (%) | C22:6 | Basic fillet       | compared to | ZWRI tomato fillet    | One way ANOVA | Games-Howell | .023 | *   |
| Fig. S8 | Fatty acids in trout fillets (%) | C22:6 | ZWRI tomato fillet | compared to | Control tomato fillet | One way ANOVA | Games-Howell | .149 |     |
| Fig. S8 | Fatty acids in feeds (%)         | C14:0 | BioMar feed        | compared to | Basic feed            | One way ANOVA | Games-Howell | .003 | **  |
| Fig. S8 | Fatty acids in feeds (%)         | C14:0 | BioMar feed        | compared to | Control tomato feed   | One way ANOVA | Games-Howell | .005 | **  |
| Fig. S8 | Fatty acids in feeds (%)         | C14:0 | BioMar feed        | compared to | ZWRI tomato feed      | One way ANOVA | Games-Howell | .009 | **  |
| Fig. S8 | Fatty acids in feeds (%)         | C14:0 | Basic feed         | compared to | Control tomato feed   | One way ANOVA | Games-Howell | .855 |     |

|         |                          |       |                  |             |                     |               |              |      |     |
|---------|--------------------------|-------|------------------|-------------|---------------------|---------------|--------------|------|-----|
| Fig. S8 | Fatty acids in feeds (%) | C14:0 | Basic feed       | compared to | ZWRI tomato feed    | One way ANOVA | Games-Howell | .269 |     |
| Fig. S8 | Fatty acids in feeds (%) | C14:0 | ZWRI tomato feed | compared to | Control tomato feed | One way ANOVA | Games-Howell | .483 |     |
| Fig. S8 | Fatty acids in feeds (%) | C16:0 | BioMar feed      | compared to | Basic feed          | One way ANOVA | Games-Howell | .000 | *** |
| Fig. S8 | Fatty acids in feeds (%) | C16:0 | BioMar feed      | compared to | Control tomato feed | One way ANOVA | Games-Howell | .004 | **  |
| Fig. S8 | Fatty acids in feeds (%) | C16:0 | BioMar feed      | compared to | ZWRI tomato feed    | One way ANOVA | Games-Howell | .001 | **  |
| Fig. S8 | Fatty acids in feeds (%) | C16:0 | Basic feed       | compared to | Control tomato feed | One way ANOVA | Games-Howell | .863 |     |
| Fig. S8 | Fatty acids in feeds (%) | C16:0 | Basic feed       | compared to | ZWRI tomato feed    | One way ANOVA | Games-Howell | .078 |     |
| Fig. S8 | Fatty acids in feeds (%) | C16:0 | ZWRI tomato feed | compared to | Control tomato feed | One way ANOVA | Games-Howell | .380 |     |
| Fig. S8 | Fatty acids in feeds (%) | C16:1 | BioMar feed      | compared to | Basic feed          | One way ANOVA | Games-Howell | .000 | *** |
| Fig. S8 | Fatty acids in feeds (%) | C16:1 | BioMar feed      | compared to | Control tomato feed | One way ANOVA | Games-Howell | .000 | *** |
| Fig. S8 | Fatty acids in feeds (%) | C16:1 | BioMar feed      | compared to | ZWRI tomato feed    | One way ANOVA | Games-Howell | .002 | **  |

|         |                          |       |                  |             |                     |               |              |      |     |
|---------|--------------------------|-------|------------------|-------------|---------------------|---------------|--------------|------|-----|
| Fig. S8 | Fatty acids in feeds (%) | C16:1 | Basic feed       | compared to | Control tomato feed | One way ANOVA | Games-Howell | .887 |     |
| Fig. S8 | Fatty acids in feeds (%) | C16:1 | Basic feed       | compared to | ZWRI tomato feed    | One way ANOVA | Games-Howell | .504 |     |
| Fig. S8 | Fatty acids in feeds (%) | C16:1 | ZWRI tomato feed | compared to | Control tomato feed | One way ANOVA | Games-Howell | .768 |     |
| Fig. S8 | Fatty acids in feeds (%) | C18:0 | BioMar feed      | compared to | Basic feed          | One way ANOVA | Games-Howell | .004 | **  |
| Fig. S8 | Fatty acids in feeds (%) | C18:0 | BioMar feed      | compared to | Control tomato feed | One way ANOVA | Games-Howell | .081 |     |
| Fig. S8 | Fatty acids in feeds (%) | C18:0 | BioMar feed      | compared to | ZWRI tomato feed    | One way ANOVA | Games-Howell | .020 | *   |
| Fig. S8 | Fatty acids in feeds (%) | C18:0 | Basic feed       | compared to | Control tomato feed | One way ANOVA | Games-Howell | .441 |     |
| Fig. S8 | Fatty acids in feeds (%) | C18:0 | Basic feed       | compared to | ZWRI tomato feed    | One way ANOVA | Games-Howell | .979 |     |
| Fig. S8 | Fatty acids in feeds (%) | C18:0 | ZWRI tomato feed | compared to | Control tomato feed | One way ANOVA | Games-Howell | .768 |     |
| Fig. S8 | Fatty acids in feeds (%) | C18:1 | BioMar feed      | compared to | Basic feed          | One way ANOVA | Games-Howell | .000 | *** |
| Fig. S8 | Fatty acids in feeds (%) | C18:1 | BioMar feed      | compared to | Control tomato feed | One way ANOVA | Games-Howell | .001 | *** |

|         |                          |       |                  |             |                     |               |              |       |     |
|---------|--------------------------|-------|------------------|-------------|---------------------|---------------|--------------|-------|-----|
| Fig. S8 | Fatty acids in feeds (%) | C18:1 | BioMar feed      | compared to | ZWRI tomato feed    | One way ANOVA | Games-Howell | .000  | *** |
| Fig. S8 | Fatty acids in feeds (%) | C18:1 | Basic feed       | compared to | Control tomato feed | One way ANOVA | Games-Howell | .808  |     |
| Fig. S8 | Fatty acids in feeds (%) | C18:1 | Basic feed       | compared to | ZWRI tomato feed    | One way ANOVA | Games-Howell | .285  |     |
| Fig. S8 | Fatty acids in feeds (%) | C18:1 | ZWRI tomato feed | compared to | Control tomato feed | One way ANOVA | Games-Howell | .677  |     |
| Fig. S8 | Fatty acids in feeds (%) | C18:2 | BioMar feed      | compared to | Basic feed          | One way ANOVA | Games-Howell | .000  | *** |
| Fig. S8 | Fatty acids in feeds (%) | C18:2 | BioMar feed      | compared to | Control tomato feed | One way ANOVA | Games-Howell | .000  | *** |
| Fig. S8 | Fatty acids in feeds (%) | C18:2 | BioMar feed      | compared to | ZWRI tomato feed    | One way ANOVA | Games-Howell | .000  | *** |
| Fig. S8 | Fatty acids in feeds (%) | C18:2 | Basic feed       | compared to | Control tomato feed | One way ANOVA | Games-Howell | .493  |     |
| Fig. S8 | Fatty acids in feeds (%) | C18:2 | Basic feed       | compared to | ZWRI tomato feed    | One way ANOVA | Games-Howell | 1.000 |     |
| Fig. S8 | Fatty acids in feeds (%) | C18:2 | ZWRI tomato feed | compared to | Control tomato feed | One way ANOVA | Games-Howell | .076  |     |
| Fig. S8 | Fatty acids in feeds (%) | C18:3 | BioMar feed      | compared to | Basic feed          | One way ANOVA | Games-Howell | .000  | *** |

|         |                          |       |                  |             |                     |               |              |      |     |
|---------|--------------------------|-------|------------------|-------------|---------------------|---------------|--------------|------|-----|
| Fig. S8 | Fatty acids in feeds (%) | C18:3 | BioMar feed      | compared to | Control tomato feed | One way ANOVA | Games-Howell | .000 | *** |
| Fig. S8 | Fatty acids in feeds (%) | C18:3 | BioMar feed      | compared to | ZWRI tomato feed    | One way ANOVA | Games-Howell | .000 | *** |
| Fig. S8 | Fatty acids in feeds (%) | C18:3 | Basic feed       | compared to | Control tomato feed | One way ANOVA | Games-Howell | .716 |     |
| Fig. S8 | Fatty acids in feeds (%) | C18:3 | Basic feed       | compared to | ZWRI tomato feed    | One way ANOVA | Games-Howell | .269 |     |
| Fig. S8 | Fatty acids in feeds (%) | C18:3 | ZWRI tomato feed | compared to | Control tomato feed | One way ANOVA | Games-Howell | .768 |     |
| Fig. S8 | Fatty acids in feeds (%) | C20:1 | BioMar feed      | compared to | Basic feed          | One way ANOVA | Games-Howell | .001 | *** |
| Fig. S8 | Fatty acids in feeds (%) | C20:1 | BioMar feed      | compared to | Control tomato feed | One way ANOVA | Games-Howell | .000 | *** |
| Fig. S8 | Fatty acids in feeds (%) | C20:1 | BioMar feed      | compared to | ZWRI tomato feed    | One way ANOVA | Games-Howell | .001 | **  |
| Fig. S8 | Fatty acids in feeds (%) | C20:1 | Basic feed       | compared to | Control tomato feed | One way ANOVA | Games-Howell | .427 |     |
| Fig. S8 | Fatty acids in feeds (%) | C20:1 | Basic feed       | compared to | ZWRI tomato feed    | One way ANOVA | Games-Howell | .717 |     |
| Fig. S8 | Fatty acids in feeds (%) | C20:1 | ZWRI tomato feed | compared to | Control tomato feed | One way ANOVA | Games-Howell | .406 |     |

|         |                          |       |                  |             |                     |               |              |      |     |
|---------|--------------------------|-------|------------------|-------------|---------------------|---------------|--------------|------|-----|
| Fig. S8 | Fatty acids in feeds (%) | C20:5 | BioMar feed      | compared to | Basic feed          | One way ANOVA | Games-Howell | .000 | *** |
| Fig. S8 | Fatty acids in feeds (%) | C20:5 | BioMar feed      | compared to | Control tomato feed | One way ANOVA | Games-Howell | .003 | **  |
| Fig. S8 | Fatty acids in feeds (%) | C20:5 | BioMar feed      | compared to | ZWRI tomato feed    | One way ANOVA | Games-Howell | .000 | *** |
| Fig. S8 | Fatty acids in feeds (%) | C20:5 | Basic feed       | compared to | Control tomato feed | One way ANOVA | Games-Howell | .716 |     |
| Fig. S8 | Fatty acids in feeds (%) | C20:5 | Basic feed       | compared to | ZWRI tomato feed    | One way ANOVA | Games-Howell | .190 |     |
| Fig. S8 | Fatty acids in feeds (%) | C20:5 | ZWRI tomato feed | compared to | Control tomato feed | One way ANOVA | Games-Howell | .602 |     |
| Fig. S8 | Fatty acids in feeds (%) | C22:0 | BioMar feed      | compared to | Basic feed          | One way ANOVA | Games-Howell | .011 | *   |
| Fig. S8 | Fatty acids in feeds (%) | C22:0 | BioMar feed      | compared to | Control tomato feed | One way ANOVA | Games-Howell | .004 | **  |
| Fig. S8 | Fatty acids in feeds (%) | C22:0 | BioMar feed      | compared to | ZWRI tomato feed    | One way ANOVA | Games-Howell | .015 | *   |
| Fig. S8 | Fatty acids in feeds (%) | C22:0 | Basic feed       | compared to | Control tomato feed | One way ANOVA | Games-Howell | .305 |     |
| Fig. S8 | Fatty acids in feeds (%) | C22:0 | Basic feed       | compared to | ZWRI tomato feed    | One way ANOVA | Games-Howell | .369 |     |

|         |                                        |       |                  |             |                       |               |              |       |    |
|---------|----------------------------------------|-------|------------------|-------------|-----------------------|---------------|--------------|-------|----|
| Fig. S8 | Fatty acids in feeds (%)               | C22:0 | ZWRI tomato feed | compared to | Control tomato feed   | One way ANOVA | Games-Howell | .914  |    |
| Fig. S8 | Fatty acids in feeds (%)               | C22:6 | BioMar feed      | compared to | Basic feed            | One way ANOVA | Games-Howell | .004  | ** |
| Fig. S8 | Fatty acids in feeds (%)               | C22:6 | BioMar feed      | compared to | Control tomato feed   | One way ANOVA | Games-Howell | .071  |    |
| Fig. S8 | Fatty acids in feeds (%)               | C22:6 | BioMar feed      | compared to | ZWRI tomato feed      | One way ANOVA | Games-Howell | .004  | ** |
| Fig. S8 | Fatty acids in feeds (%)               | C22:6 | Basic feed       | compared to | Control tomato feed   | One way ANOVA | Games-Howell | .973  |    |
| Fig. S8 | Fatty acids in feeds (%)               | C22:6 | Basic feed       | compared to | ZWRI tomato feed      | One way ANOVA | Games-Howell | .075  |    |
| Fig. S8 | Fatty acids in feeds (%)               | C22:6 | ZWRI tomato feed | compared to | Control tomato feed   | One way ANOVA | Games-Howell | .424  |    |
| Fig. S8 | Fatty acids in trout fillets (mg/g DW) | C14:0 | BioMar fillet    | compared to | Basic fillet          | One way ANOVA | Games-Howell | .156  |    |
| Fig. S8 | Fatty acids in trout fillets (mg/g DW) | C14:0 | BioMar fillet    | compared to | Control tomato fillet | One way ANOVA | Games-Howell | .153  |    |
| Fig. S8 | Fatty acids in trout fillets (mg/g DW) | C14:0 | BioMar fillet    | compared to | ZWRI tomato fillet    | One way ANOVA | Games-Howell | .460  |    |
| Fig. S8 | Fatty acids in trout fillets (mg/g DW) | C14:0 | Basic fillet     | compared to | Control tomato fillet | One way ANOVA | Games-Howell | 1.000 |    |

|         |                                        |       |                    |             |                       |               |              |       |     |
|---------|----------------------------------------|-------|--------------------|-------------|-----------------------|---------------|--------------|-------|-----|
| Fig. S8 | Fatty acids in trout fillets (mg/g DW) | C14:0 | Basic fillet       | compared to | ZWRI tomato fillet    | One way ANOVA | Games-Howell | .003  | **  |
| Fig. S8 | Fatty acids in trout fillets (mg/g DW) | C14:0 | ZWRI tomato fillet | compared to | Control tomato fillet | One way ANOVA | Games-Howell | .003  | **  |
| Fig. S8 | Fatty acids in trout fillets (mg/g DW) | C16:0 | BioMar fillet      | compared to | Basic fillet          | One way ANOVA | Tukey        | .000  | *** |
| Fig. S8 | Fatty acids in trout fillets (mg/g DW) | C16:0 | BioMar fillet      | compared to | Control tomato fillet | One way ANOVA | Tukey        | .000  | *** |
| Fig. S8 | Fatty acids in trout fillets (mg/g DW) | C16:0 | BioMar fillet      | compared to | ZWRI tomato fillet    | One way ANOVA | Tukey        | .000  | *** |
| Fig. S8 | Fatty acids in trout fillets (mg/g DW) | C16:0 | Basic fillet       | compared to | Control tomato fillet | One way ANOVA | Tukey        | 1.000 |     |
| Fig. S8 | Fatty acids in trout fillets (mg/g DW) | C16:0 | Basic fillet       | compared to | ZWRI tomato fillet    | One way ANOVA | Tukey        | .000  | *** |
| Fig. S8 | Fatty acids in trout fillets (mg/g DW) | C16:0 | ZWRI tomato fillet | compared to | Control tomato fillet | One way ANOVA | Tukey        | .000  | *** |
| Fig. S8 | Fatty acids in trout fillets (mg/g DW) | C16:1 | BioMar fillet      | compared to | Basic fillet          | One way ANOVA | Games-Howell | .000  | *** |
| Fig. S8 | Fatty acids in trout fillets (mg/g DW) | C16:1 | BioMar fillet      | compared to | Control tomato fillet | One way ANOVA | Games-Howell | .000  | *** |
| Fig. S8 | Fatty acids in trout fillets (mg/g DW) | C16:1 | BioMar fillet      | compared to | ZWRI tomato fillet    | One way ANOVA | Games-Howell | .108  |     |



|         |                                        |       |                    |             |                       |               |              |      |     |
|---------|----------------------------------------|-------|--------------------|-------------|-----------------------|---------------|--------------|------|-----|
| Fig. S8 | Fatty acids in trout fillets (mg/g DW) | C16:1 | Basic fillet       | compared to | Control tomato fillet | One way ANOVA | Games-Howell | .881 |     |
| Fig. S8 | Fatty acids in trout fillets (mg/g DW) | C16:1 | Basic fillet       | compared to | ZWRI tomato fillet    | One way ANOVA | Games-Howell | .002 | **  |
| Fig. S8 | Fatty acids in trout fillets (mg/g DW) | C16:1 | ZWRI tomato fillet | compared to | Control tomato fillet | One way ANOVA | Games-Howell | .000 | *** |
| Fig. S8 | Fatty acids in trout fillets (mg/g DW) | C18:0 | BioMar fillet      | compared to | Basic fillet          | One way ANOVA | Tukey        | .000 | *** |
| Fig. S8 | Fatty acids in trout fillets (mg/g DW) | C18:0 | BioMar fillet      | compared to | Control tomato fillet | One way ANOVA | Tukey        | .000 | *** |
| Fig. S8 | Fatty acids in trout fillets (mg/g DW) | C18:0 | BioMar fillet      | compared to | ZWRI tomato fillet    | One way ANOVA | Tukey        | .000 | *** |
| Fig. S8 | Fatty acids in trout fillets (mg/g DW) | C18:0 | Basic fillet       | compared to | Control tomato fillet | One way ANOVA | Tukey        | .861 |     |
| Fig. S8 | Fatty acids in trout fillets (mg/g DW) | C18:0 | Basic fillet       | compared to | ZWRI tomato fillet    | One way ANOVA | Tukey        | .000 | *** |
| Fig. S8 | Fatty acids in trout fillets (mg/g DW) | C18:0 | ZWRI tomato fillet | compared to | Control tomato fillet | One way ANOVA | Tukey        | .000 | *** |
| Fig. S8 | Fatty acids in trout fillets (mg/g DW) | C18:1 | BioMar fillet      | compared to | Basic fillet          | One way ANOVA | Games-Howell | .286 |     |
| Fig. S8 | Fatty acids in trout fillets (mg/g DW) | C18:1 | BioMar fillet      | compared to | Control tomato fillet | One way ANOVA | Games-Howell | .294 |     |

|         |                                        |       |                    |             |                       |               |              |       |     |
|---------|----------------------------------------|-------|--------------------|-------------|-----------------------|---------------|--------------|-------|-----|
| Fig. S8 | Fatty acids in trout fillets (mg/g DW) | C18:1 | BioMar fillet      | compared to | ZWRI tomato fillet    | One way ANOVA | Games-Howell | .000  | *** |
| Fig. S8 | Fatty acids in trout fillets (mg/g DW) | C18:1 | Basic fillet       | compared to | Control tomato fillet | One way ANOVA | Games-Howell | 1.000 |     |
| Fig. S8 | Fatty acids in trout fillets (mg/g DW) | C18:1 | Basic fillet       | compared to | ZWRI tomato fillet    | One way ANOVA | Games-Howell | .000  | *** |
| Fig. S8 | Fatty acids in trout fillets (mg/g DW) | C18:1 | ZWRI tomato fillet | compared to | Control tomato fillet | One way ANOVA | Games-Howell | .000  | *** |
| Fig. S8 | Fatty acids in trout fillets (mg/g DW) | C18:2 | BioMar fillet      | compared to | Basic fillet          | One way ANOVA | Games-Howell | .000  | *** |
| Fig. S8 | Fatty acids in trout fillets (mg/g DW) | C18:2 | BioMar fillet      | compared to | Control tomato fillet | One way ANOVA | Games-Howell | .000  | *** |
| Fig. S8 | Fatty acids in trout fillets (mg/g DW) | C18:2 | BioMar fillet      | compared to | ZWRI tomato fillet    | One way ANOVA | Games-Howell | .000  | *** |
| Fig. S8 | Fatty acids in trout fillets (mg/g DW) | C18:2 | Basic fillet       | compared to | Control tomato fillet | One way ANOVA | Games-Howell | .885  |     |
| Fig. S8 | Fatty acids in trout fillets (mg/g DW) | C18:2 | Basic fillet       | compared to | ZWRI tomato fillet    | One way ANOVA | Games-Howell | .000  | *** |
| Fig. S8 | Fatty acids in trout fillets (mg/g DW) | C18:2 | ZWRI tomato fillet | compared to | Control tomato fillet | One way ANOVA | Games-Howell | .014  | *   |
| Fig. S8 | Fatty acids in trout fillets (mg/g DW) | C18:3 | BioMar fillet      | compared to | Basic fillet          | One way ANOVA | Games-Howell | .000  | *** |

|         |                                        |       |                    |             |                       |               |              |      |     |
|---------|----------------------------------------|-------|--------------------|-------------|-----------------------|---------------|--------------|------|-----|
| Fig. S8 | Fatty acids in trout fillets (mg/g DW) | C18:3 | BioMar fillet      | compared to | Control tomato fillet | One way ANOVA | Games-Howell | .000 | *** |
| Fig. S8 | Fatty acids in trout fillets (mg/g DW) | C18:3 | BioMar fillet      | compared to | ZWRI tomato fillet    | One way ANOVA | Games-Howell | .000 | *** |
| Fig. S8 | Fatty acids in trout fillets (mg/g DW) | C18:3 | Basic fillet       | compared to | Control tomato fillet | One way ANOVA | Games-Howell | .259 |     |
| Fig. S8 | Fatty acids in trout fillets (mg/g DW) | C18:3 | Basic fillet       | compared to | ZWRI tomato fillet    | One way ANOVA | Games-Howell | .000 | *** |
| Fig. S8 | Fatty acids in trout fillets (mg/g DW) | C18:3 | ZWRI tomato fillet | compared to | Control tomato fillet | One way ANOVA | Games-Howell | .000 | *** |
| Fig. S8 | Fatty acids in trout fillets (mg/g DW) | C20:1 | BioMar fillet      | compared to | Basic fillet          | One way ANOVA | Games-Howell | .000 | *** |
| Fig. S8 | Fatty acids in trout fillets (mg/g DW) | C20:1 | BioMar fillet      | compared to | Control tomato fillet | One way ANOVA | Games-Howell | .000 | *** |
| Fig. S8 | Fatty acids in trout fillets (mg/g DW) | C20:1 | BioMar fillet      | compared to | ZWRI tomato fillet    | One way ANOVA | Games-Howell | .000 | *** |
| Fig. S8 | Fatty acids in trout fillets (mg/g DW) | C20:1 | Basic fillet       | compared to | Control tomato fillet | One way ANOVA | Games-Howell | .688 |     |
| Fig. S8 | Fatty acids in trout fillets (mg/g DW) | C20:1 | Basic fillet       | compared to | ZWRI tomato fillet    | One way ANOVA | Games-Howell | .019 | *   |
| Fig. S8 | Fatty acids in trout fillets (mg/g DW) | C20:1 | ZWRI tomato fillet | compared to | Control tomato fillet | One way ANOVA | Games-Howell | .003 | **  |

|         |                                        |       |                    |             |                       |               |              |      |     |
|---------|----------------------------------------|-------|--------------------|-------------|-----------------------|---------------|--------------|------|-----|
| Fig. S8 | Fatty acids in trout fillets (mg/g DW) | C20:5 | BioMar fillet      | compared to | Basic fillet          | One way ANOVA | Games-Howell | .000 | *** |
| Fig. S8 | Fatty acids in trout fillets (mg/g DW) | C20:5 | BioMar fillet      | compared to | Control tomato fillet | One way ANOVA | Games-Howell | .000 | *** |
| Fig. S8 | Fatty acids in trout fillets (mg/g DW) | C20:5 | BioMar fillet      | compared to | ZWRI tomato fillet    | One way ANOVA | Games-Howell | .000 | *** |
| Fig. S8 | Fatty acids in trout fillets (mg/g DW) | C20:5 | Basic fillet       | compared to | Control tomato fillet | One way ANOVA | Games-Howell | .999 |     |
| Fig. S8 | Fatty acids in trout fillets (mg/g DW) | C20:5 | Basic fillet       | compared to | ZWRI tomato fillet    | One way ANOVA | Games-Howell | .036 | *   |
| Fig. S8 | Fatty acids in trout fillets (mg/g DW) | C20:5 | ZWRI tomato fillet | compared to | Control tomato fillet | One way ANOVA | Games-Howell | .069 |     |
| Fig. S8 | Fatty acids in trout fillets (mg/g DW) | C22:6 | BioMar fillet      | compared to | Basic fillet          | One way ANOVA | Games-Howell | .002 | **  |
| Fig. S8 | Fatty acids in trout fillets (mg/g DW) | C22:6 | BioMar fillet      | compared to | Control tomato fillet | One way ANOVA | Games-Howell | .002 | **  |
| Fig. S8 | Fatty acids in trout fillets (mg/g DW) | C22:6 | BioMar fillet      | compared to | ZWRI tomato fillet    | One way ANOVA | Games-Howell | .000 | *** |
| Fig. S8 | Fatty acids in trout fillets (mg/g DW) | C22:6 | Basic fillet       | compared to | Control tomato fillet | One way ANOVA | Games-Howell | .997 |     |
| Fig. S8 | Fatty acids in trout fillets (mg/g DW) | C22:6 | Basic fillet       | compared to | ZWRI tomato fillet    | One way ANOVA | Games-Howell | .107 |     |

|         |                                        |                   |                    |             |                       |               |              |      |     |
|---------|----------------------------------------|-------------------|--------------------|-------------|-----------------------|---------------|--------------|------|-----|
| Fig. S8 | Fatty acids in trout fillets (mg/g DW) | C22:6             | ZWRI tomato fillet | compared to | Control tomato fillet | One way ANOVA | Games-Howell | .063 |     |
| Fig. S8 | Fatty acids in trout fillets (mg/g DW) | Total fatty acids | BioMar fillet      | compared to | Basic fillet          | One way ANOVA | Tukey        | .000 | *** |
| Fig. S8 | Fatty acids in trout fillets (mg/g DW) | Total fatty acids | BioMar fillet      | compared to | Control tomato fillet | One way ANOVA | Tukey        | .000 | *** |
| Fig. S8 | Fatty acids in trout fillets (mg/g DW) | Total fatty acids | BioMar fillet      | compared to | ZWRI tomato fillet    | One way ANOVA | Tukey        | .036 | *   |
| Fig. S8 | Fatty acids in trout fillets (mg/g DW) | Total fatty acids | Basic fillet       | compared to | Control tomato fillet | One way ANOVA | Tukey        | .996 |     |
| Fig. S8 | Fatty acids in trout fillets (mg/g DW) | Total fatty acids | Basic fillet       | compared to | ZWRI tomato fillet    | One way ANOVA | Tukey        | .000 | *** |
| Fig. S8 | Fatty acids in trout fillets (mg/g DW) | Total fatty acids | ZWRI tomato fillet | compared to | Control tomato fillet | One way ANOVA | Tukey        | .000 | *** |
| Fig. S8 | Fatty acids in trout feeds (mg/g DW)   | C14:0             | BioMar feed        | compared to | Basic feed            | One way ANOVA | Tukey        | .042 | *   |
| Fig. S8 | Fatty acids in trout feeds (mg/g DW)   | C14:0             | BioMar feed        | compared to | Control tomato feed   | One way ANOVA | Tukey        | .001 | **  |
| Fig. S8 | Fatty acids in trout feeds (mg/g DW)   | C14:0             | BioMar feed        | compared to | ZWRI tomato feed      | One way ANOVA | Tukey        | .004 | **  |
| Fig. S8 | Fatty acids in trout feeds (mg/g DW)   | C14:0             | Basic feed         | compared to | Control tomato feed   | One way ANOVA | Tukey        | .058 |     |

|         |                                      |       |                  |             |                     |               |              |      |     |
|---------|--------------------------------------|-------|------------------|-------------|---------------------|---------------|--------------|------|-----|
| Fig. S8 | Fatty acids in trout feeds (mg/g DW) | C14:0 | Basic feed       | compared to | ZWRI tomato feed    | One way ANOVA | Tukey        | .276 |     |
| Fig. S8 | Fatty acids in trout feeds (mg/g DW) | C14:0 | ZWRI tomato feed | compared to | Control tomato feed | One way ANOVA | Tukey        | .747 |     |
| Fig. S8 | Fatty acids in trout feeds (mg/g DW) | C16:0 | BioMar feed      | compared to | Basic feed          | One way ANOVA | Games-Howell | .042 | *   |
| Fig. S8 | Fatty acids in trout feeds (mg/g DW) | C16:0 | BioMar feed      | compared to | Control tomato feed | One way ANOVA | Games-Howell | .085 |     |
| Fig. S8 | Fatty acids in trout feeds (mg/g DW) | C16:0 | BioMar feed      | compared to | ZWRI tomato feed    | One way ANOVA | Games-Howell | .043 | *   |
| Fig. S8 | Fatty acids in trout feeds (mg/g DW) | C16:0 | Basic feed       | compared to | Control tomato feed | One way ANOVA | Games-Howell | .140 |     |
| Fig. S8 | Fatty acids in trout feeds (mg/g DW) | C16:0 | Basic feed       | compared to | ZWRI tomato feed    | One way ANOVA | Games-Howell | .391 |     |
| Fig. S8 | Fatty acids in trout feeds (mg/g DW) | C16:0 | ZWRI tomato feed | compared to | Control tomato feed | One way ANOVA | Games-Howell | .344 |     |
| Fig. S8 | Fatty acids in trout feeds (mg/g DW) | C16:1 | BioMar feed      | compared to | Basic feed          | One way ANOVA | Tukey        | .000 | *** |
| Fig. S8 | Fatty acids in trout feeds (mg/g DW) | C16:1 | BioMar feed      | compared to | Control tomato feed | One way ANOVA | Tukey        | .000 | *** |
| Fig. S8 | Fatty acids in trout feeds (mg/g DW) | C16:1 | BioMar feed      | compared to | ZWRI tomato feed    | One way ANOVA | Tukey        | .000 | *** |

|         |                                      |       |                  |             |                     |               |              |      |    |
|---------|--------------------------------------|-------|------------------|-------------|---------------------|---------------|--------------|------|----|
| Fig. S8 | Fatty acids in trout feeds (mg/g DW) | C16:1 | Basic feed       | compared to | Control tomato feed | One way ANOVA | Tukey        | .027 | *  |
| Fig. S8 | Fatty acids in trout feeds (mg/g DW) | C16:1 | Basic feed       | compared to | ZWRI tomato feed    | One way ANOVA | Tukey        | .234 |    |
| Fig. S8 | Fatty acids in trout feeds (mg/g DW) | C16:1 | ZWRI tomato feed | compared to | Control tomato feed | One way ANOVA | Tukey        | .549 |    |
| Fig. S8 | Fatty acids in trout feeds (mg/g DW) | C18:0 | BioMar feed      | compared to | Basic feed          | One way ANOVA | Games-Howell | .907 |    |
| Fig. S8 | Fatty acids in trout feeds (mg/g DW) | C18:0 | BioMar feed      | compared to | Control tomato feed | One way ANOVA | Games-Howell | .019 | *  |
| Fig. S8 | Fatty acids in trout feeds (mg/g DW) | C18:0 | BioMar feed      | compared to | ZWRI tomato feed    | One way ANOVA | Games-Howell | .239 |    |
| Fig. S8 | Fatty acids in trout feeds (mg/g DW) | C18:0 | Basic feed       | compared to | Control tomato feed | One way ANOVA | Games-Howell | .190 |    |
| Fig. S8 | Fatty acids in trout feeds (mg/g DW) | C18:0 | Basic feed       | compared to | ZWRI tomato feed    | One way ANOVA | Games-Howell | .428 |    |
| Fig. S8 | Fatty acids in trout feeds (mg/g DW) | C18:0 | ZWRI tomato feed | compared to | Control tomato feed | One way ANOVA | Games-Howell | .380 |    |
| Fig. S8 | Fatty acids in trout feeds (mg/g DW) | C18:1 | BioMar feed      | compared to | Basic feed          | One way ANOVA | Games-Howell | .192 |    |
| Fig. S8 | Fatty acids in trout feeds (mg/g DW) | C18:1 | BioMar feed      | compared to | Control tomato feed | One way ANOVA | Games-Howell | .002 | ** |

|         |                                      |       |                  |             |                     |               |              |      |     |
|---------|--------------------------------------|-------|------------------|-------------|---------------------|---------------|--------------|------|-----|
| Fig. S8 | Fatty acids in trout feeds (mg/g DW) | C18:1 | BioMar feed      | compared to | ZWRI tomato feed    | One way ANOVA | Games-Howell | .023 | *   |
| Fig. S8 | Fatty acids in trout feeds (mg/g DW) | C18:1 | Basic feed       | compared to | Control tomato feed | One way ANOVA | Games-Howell | .165 |     |
| Fig. S8 | Fatty acids in trout feeds (mg/g DW) | C18:1 | Basic feed       | compared to | ZWRI tomato feed    | One way ANOVA | Games-Howell | .470 |     |
| Fig. S8 | Fatty acids in trout feeds (mg/g DW) | C18:1 | ZWRI tomato feed | compared to | Control tomato feed | One way ANOVA | Games-Howell | .405 |     |
| Fig. S8 | Fatty acids in trout feeds (mg/g DW) | C18:2 | BioMar feed      | compared to | Basic feed          | One way ANOVA | Games-Howell | .014 | *   |
| Fig. S8 | Fatty acids in trout feeds (mg/g DW) | C18:2 | BioMar feed      | compared to | Control tomato feed | One way ANOVA | Games-Howell | .023 | *   |
| Fig. S8 | Fatty acids in trout feeds (mg/g DW) | C18:2 | BioMar feed      | compared to | ZWRI tomato feed    | One way ANOVA | Games-Howell | .021 | *   |
| Fig. S8 | Fatty acids in trout feeds (mg/g DW) | C18:2 | Basic feed       | compared to | Control tomato feed | One way ANOVA | Games-Howell | .120 |     |
| Fig. S8 | Fatty acids in trout feeds (mg/g DW) | C18:2 | Basic feed       | compared to | ZWRI tomato feed    | One way ANOVA | Games-Howell | .438 |     |
| Fig. S8 | Fatty acids in trout feeds (mg/g DW) | C18:2 | ZWRI tomato feed | compared to | Control tomato feed | One way ANOVA | Games-Howell | .310 |     |
| Fig. S8 | Fatty acids in trout feeds (mg/g DW) | C18:3 | BioMar feed      | compared to | Basic feed          | One way ANOVA | Tukey        | .000 | *** |



|         |                                      |       |                  |             |                     |               |              |      |     |
|---------|--------------------------------------|-------|------------------|-------------|---------------------|---------------|--------------|------|-----|
| Fig. S8 | Fatty acids in trout feeds (mg/g DW) | C18:3 | BioMar feed      | compared to | Control tomato feed | One way ANOVA | Tukey        | .000 | *** |
| Fig. S8 | Fatty acids in trout feeds (mg/g DW) | C18:3 | BioMar feed      | compared to | ZWRI tomato feed    | One way ANOVA | Tukey        | .000 | *** |
| Fig. S8 | Fatty acids in trout feeds (mg/g DW) | C18:3 | Basic feed       | compared to | Control tomato feed | One way ANOVA | Tukey        | .026 | *   |
| Fig. S8 | Fatty acids in trout feeds (mg/g DW) | C18:3 | Basic feed       | compared to | ZWRI tomato feed    | One way ANOVA | Tukey        | .242 |     |
| Fig. S8 | Fatty acids in trout feeds (mg/g DW) | C18:3 | ZWRI tomato feed | compared to | Control tomato feed | One way ANOVA | Tukey        | .517 |     |
| Fig. S8 | Fatty acids in trout feeds (mg/g DW) | C20:1 | BioMar feed      | compared to | Basic feed          | One way ANOVA | Games-Howell | .190 |     |
| Fig. S8 | Fatty acids in trout feeds (mg/g DW) | C20:1 | BioMar feed      | compared to | Control tomato feed | One way ANOVA | Games-Howell | .001 | **  |
| Fig. S8 | Fatty acids in trout feeds (mg/g DW) | C20:1 | BioMar feed      | compared to | ZWRI tomato feed    | One way ANOVA | Games-Howell | .013 | *   |
| Fig. S8 | Fatty acids in trout feeds (mg/g DW) | C20:1 | Basic feed       | compared to | Control tomato feed | One way ANOVA | Games-Howell | .247 |     |
| Fig. S8 | Fatty acids in trout feeds (mg/g DW) | C20:1 | Basic feed       | compared to | ZWRI tomato feed    | One way ANOVA | Games-Howell | .474 |     |
| Fig. S8 | Fatty acids in trout feeds (mg/g DW) | C20:1 | ZWRI tomato feed | compared to | Control tomato feed | One way ANOVA | Games-Howell | .514 |     |

|         |                                      |       |                  |             |                     |               |              |      |     |
|---------|--------------------------------------|-------|------------------|-------------|---------------------|---------------|--------------|------|-----|
| Fig. S8 | Fatty acids in trout feeds (mg/g DW) | C20:5 | BioMar feed      | compared to | Basic feed          | One way ANOVA | Tukey        | .003 | **  |
| Fig. S8 | Fatty acids in trout feeds (mg/g DW) | C20:5 | BioMar feed      | compared to | Control tomato feed | One way ANOVA | Tukey        | .000 | *** |
| Fig. S8 | Fatty acids in trout feeds (mg/g DW) | C20:5 | BioMar feed      | compared to | ZWRI tomato feed    | One way ANOVA | Tukey        | .000 | *** |
| Fig. S8 | Fatty acids in trout feeds (mg/g DW) | C20:5 | Basic feed       | compared to | Control tomato feed | One way ANOVA | Tukey        | .045 | *   |
| Fig. S8 | Fatty acids in trout feeds (mg/g DW) | C20:5 | Basic feed       | compared to | ZWRI tomato feed    | One way ANOVA | Tukey        | .216 |     |
| Fig. S8 | Fatty acids in trout feeds (mg/g DW) | C20:5 | ZWRI tomato feed | compared to | Control tomato feed | One way ANOVA | Tukey        | .757 |     |
| Fig. S8 | Fatty acids in trout feeds (mg/g DW) | C22:0 | BioMar feed      | compared to | Basic feed          | One way ANOVA | Games-Howell | .680 |     |
| Fig. S8 | Fatty acids in trout feeds (mg/g DW) | C22:0 | BioMar feed      | compared to | Control tomato feed | One way ANOVA | Games-Howell | .013 | *   |
| Fig. S8 | Fatty acids in trout feeds (mg/g DW) | C22:0 | BioMar feed      | compared to | ZWRI tomato feed    | One way ANOVA | Games-Howell | .026 | *   |
| Fig. S8 | Fatty acids in trout feeds (mg/g DW) | C22:0 | Basic feed       | compared to | Control tomato feed | One way ANOVA | Games-Howell | .255 |     |
| Fig. S8 | Fatty acids in trout feeds (mg/g DW) | C22:0 | Basic feed       | compared to | ZWRI tomato feed    | One way ANOVA | Games-Howell | .428 |     |

|         |                                      |                   |                  |             |                     |               |              |      |   |
|---------|--------------------------------------|-------------------|------------------|-------------|---------------------|---------------|--------------|------|---|
| Fig. S8 | Fatty acids in trout feeds (mg/g DW) | C22:0             | ZWRI tomato feed | compared to | Control tomato feed | One way ANOVA | Games-Howell | .751 |   |
| Fig. S8 | Fatty acids in trout feeds (mg/g DW) | C22:6             | BioMar feed      | compared to | Basic feed          | One way ANOVA | Games-Howell | .996 |   |
| Fig. S8 | Fatty acids in trout feeds (mg/g DW) | C22:6             | BioMar feed      | compared to | Control tomato feed | One way ANOVA | Games-Howell | .056 |   |
| Fig. S8 | Fatty acids in trout feeds (mg/g DW) | C22:6             | BioMar feed      | compared to | ZWRI tomato feed    | One way ANOVA | Games-Howell | .020 | * |
| Fig. S8 | Fatty acids in trout feeds (mg/g DW) | C22:6             | Basic feed       | compared to | Control tomato feed | One way ANOVA | Games-Howell | .210 |   |
| Fig. S8 | Fatty acids in trout feeds (mg/g DW) | C22:6             | Basic feed       | compared to | ZWRI tomato feed    | One way ANOVA | Games-Howell | .389 |   |
| Fig. S8 | Fatty acids in trout feeds (mg/g DW) | C22:6             | ZWRI tomato feed | compared to | Control tomato feed | One way ANOVA | Games-Howell | .499 |   |
| Fig. S8 | Fatty acids in trout feeds (mg/g DW) | Total fatty acids | BioMar feed      | compared to | Basic feed          | One way ANOVA | Games-Howell | .316 |   |
| Fig. S8 | Fatty acids in trout feeds (mg/g DW) | Total fatty acids | BioMar feed      | compared to | Control tomato feed | One way ANOVA | Games-Howell | .305 |   |
| Fig. S8 | Fatty acids in trout feeds (mg/g DW) | Total fatty acids | BioMar feed      | compared to | ZWRI tomato feed    | One way ANOVA | Games-Howell | .950 |   |
| Fig. S8 | Fatty acids in trout feeds (mg/g DW) | Total fatty acids | Basic feed       | compared to | Control tomato feed | One way ANOVA | Games-Howell | .144 |   |

|         |                                      |                   |                  |             |                     |               |              |      |
|---------|--------------------------------------|-------------------|------------------|-------------|---------------------|---------------|--------------|------|
| Fig. S8 | Fatty acids in trout feeds (mg/g DW) | Total fatty acids | Basic feed       | compared to | ZWRI tomato feed    | One way ANOVA | Games-Howell | .430 |
| Fig. S8 | Fatty acids in trout feeds (mg/g DW) | Total fatty acids | ZWRI tomato feed | compared to | Control tomato feed | One way ANOVA | Games-Howell | .357 |

The type of statistical analysis used to find significant differences of a dependent variable between samples are shown as well as the p-values obtained for each statistical test. \*, P<0.05; \*\*, P<0.01 and \*\*\*, P<0.001.
